# Supplementary material for: Synthesis of potent and selective HDAC6 inhibitors led to unexpected opening of a quinazoline ring
Source: PubMed Central journal article supplement (PMC9006239; doi:10.1039/d2ra01753a), 2022-04-13

## Supplementary Materials

### Synthesis of Potent and Selective HDAC6 Inhibitors led to Unexpected Opening of Quinazoline Ring

Davide Moj,<sup>1,2,‡</sup> Andrea Citarella,<sup>1,2,‡</sup> Davide Bonanni,<sup>1</sup> Luca Pinzi,<sup>1</sup> Daniele Passarella,<sup>2</sup> Alessandra Silvani,<sup>2</sup> Clelia Giannini<sup>2</sup> and Giulio Rastelli<sup>1\*</sup>

<sup>1</sup> Department of Life Sciences, University of Modena and Reggio Emilia. Via Campi 103, 41125 Modena, Italy

<sup>2</sup> Department of Chemistry, University of Milan, Via Golgi 19, 20133 Milano, Italy

‡ Equally contributing authors

\* Corresponding author: giulio.rastelli@unimore.it

#### Table of contents

---

|                                                               | Pag.   |
|---------------------------------------------------------------|--------|
| Table S1                                                      | S1     |
| Table S2                                                      | S2-S6  |
| Figure S1-S3: Dose response curves                            | S7     |
| <sup>1</sup> H, <sup>13</sup> C NMR Spectra for all compounds | S8-S19 |
| HPLC-MS for 11a and 18                                        | S20    |

**Table S1:** Chemical fragments including the benzohydroxamate, 1,3-benzodioxole and quinazoline substructures, identified among HDAC6 inhibitors. The number of compounds including the fragments and their prevalence (“Actives / Inactives rate”) among the active and inactive classes are reported in the table.

| Fragment ID | Fragment SMILES                   | Global Rank | Number of HDAC6 compounds | Number of active compounds | Number of inactive compounds | Actives / Inactives rate | Substructure Class |
|-------------|-----------------------------------|-------------|---------------------------|----------------------------|------------------------------|--------------------------|--------------------|
| Fragment 1  | <chem>O=Cc1ccc(C(=O)NO)cc1</chem> | 6           | 42                        | 41                         | 1                            | 41.00                    | benzohydroxamate   |
| Fragment 2  | <chem>Nc1ccc(C(=O)NO)cc1</chem>   | 44          | 402                       | 382                        | 20                           | 19.10                    | benzohydroxamate   |
| Fragment 3  | <chem>Cc1ccc(C(=O)NO)cc1</chem>   | 97          | 508                       | 470                        | 38                           | 12.37                    | benzohydroxamate   |
| Fragment 4  | <chem>CNc1ccc(C(=O)NO)cc1</chem>  | 145         | 93                        | 83                         | 10                           | 8.30                     | benzohydroxamate   |
| Fragment 5  | <chem>O=C(NO)c1ccccc1</chem>      | 167         | 694                       | 611                        | 83                           | 7.36                     | benzohydroxamate   |
| Fragment 6  | <chem>Nc1ccc(C(=O)NO)cc1</chem>   | 173         | 99                        | 87                         | 12                           | 7.25                     | benzohydroxamate   |
| Fragment 7  | <chem>O=C(NO)c1ccc(Cl)cc1</chem>  | 177         | 8                         | 7                          | 1                            | 7.00                     | benzohydroxamate   |
| Fragment 8  | <chem>Nc1cc(C(=O)NO)ccc1Cl</chem> | 183         | 8                         | 7                          | 1                            | 7.00                     | benzohydroxamate   |
| Fragment 9  | <chem>O=Cc1cccc(C(=O)NO)c1</chem> | 213         | 7                         | 6                          | 1                            | 6.00                     | benzohydroxamate   |
| Fragment 10 | <chem>CCc1ccc(C(=O)NO)cc1</chem>  | 287         | 92                        | 76                         | 16                           | 4.75                     | benzohydroxamate   |
| Fragment 11 | <chem>NCc1cccc(C(=O)NO)c1</chem>  | 421         | 23                        | 18                         | 5                            | 3.60                     | benzohydroxamate   |
| Fragment 12 | <chem>c1ccc2c(c1)OCO2</chem>      | 230         | 33                        | 28                         | 5                            | 5.60                     | 1,3 benzodioxole   |
| Fragment 13 | <chem>CCc1ccc2c(c1)OCO2</chem>    | 235         | 26                        | 22                         | 4                            | 5.50                     | 1,3 benzodioxole   |
| Fragment 14 | <chem>Cc1ccc2c(c1)OCO2</chem>     | 238         | 32                        | 27                         | 5                            | 5.40                     | 1,3 benzodioxole   |
| Fragment 15 | <chem>Cc1ncc2ccccc2n1</chem>      | 141         | 70                        | 63                         | 7                            | 9.00                     | quinazoline        |
| Fragment 16 | <chem>c1ccc2ncncc2c1</chem>       | 491         | 151                       | 115                        | 36                           | 3.19                     | quinazoline        |
| Fragment 17 | <chem>Cc1ncnc2ccccc12</chem>      | 509         | 4                         | 3                          | 1                            | 3.00                     | quinazoline        |

**Table S2:** Top-ranking similarities obtained for the derivatives 11a and 11b with respect to the HDAC6 ligands reported in ChEMBL, according to the MACCS and ECFP4 fingerprints. The similarity degree between the ligands is reported as a mean of the Tanimoto index. Only similarity values above commonly accepted thresholds are reported. The document reference ID of the ligands in ChEMBL are also reported.

| <b>Compound ID</b> | <b>ChEMBL ID</b> | <b>MACCSfp<br/>similarity score</b> | <b>ECFP4fp similarity<br/>score</b> | <b>Document ChEMBL ID</b> |
|--------------------|------------------|-------------------------------------|-------------------------------------|---------------------------|
| 11a                | CHEMBL3655929    | 0.844                               | 0.5                                 | CHEMBL3639071             |
| 11a                | CHEMBL3655997    | 0.831                               | 0.459                               | CHEMBL3639071             |
| 11a                | CHEMBL3601777    | 0.677                               | 0.639                               | CHEMBL3600352             |
| 11a                | CHEMBL4073021    | 0.633                               | 0.606                               | CHEMBL4024792             |
| 11a                | CHEMBL3314863    | 0.683                               | 0.6                                 | CHEMBL3351281             |
| 11a                | CHEMBL3601776    | 0.734                               | 0.564                               | CHEMBL3600352             |
| 11a                | CHEMBL3918660    | 0.646                               | 0.556                               | CHEMBL3886619             |
| 11a                | CHEMBL3798183    | 0.645                               | 0.556                               | CHEMBL3797085             |
| 11a                | CHEMBL3893799    | 0.6                                 | 0.556                               | CHEMBL3886619             |
| 11a                | CHEMBL3655914    | 0.656                               | 0.545                               | CHEMBL3639071             |
| 11a                | CHEMBL3652237    | 0.609                               | 0.545                               | CHEMBL3639071             |
| 11a                | CHEMBL3960564    | 0.612                               | 0.541                               | CHEMBL3886619             |
| 11a                | CHEMBL4466930    | 0.588                               | 0.541                               | CHEMBL4385610             |
| 11a                | CHEMBL4210907    | 0.631                               | 0.537                               | CHEMBL4196108             |
| 11a                | CHEMBL4073165    | 0.677                               | 0.529                               | CHEMBL4024792             |
| 11a                | CHEMBL4061807    | 0.661                               | 0.529                               | CHEMBL4024792             |
| 11a                | CHEMBL4079874    | 0.661                               | 0.529                               | CHEMBL4024792             |
| 11a                | CHEMBL4068310    | 0.645                               | 0.529                               | CHEMBL4024792             |
| 11a                | CHEMBL3909186    | 0.683                               | 0.528                               | CHEMBL3886619             |
| 11a                | CHEMBL3909854    | 0.683                               | 0.528                               | CHEMBL3886619             |
| 11a                | CHEMBL3927508    | 0.635                               | 0.528                               | CHEMBL3886619             |
| 11a                | CHEMBL3958794    | 0.603                               | 0.528                               | CHEMBL4385610             |
| 11a                | CHEMBL3979548    | 0.594                               | 0.528                               | CHEMBL3886619             |
| 11a                | CHEMBL3971436    | 0.582                               | 0.528                               | CHEMBL4385610             |
| 11a                | CHEMBL3798027    | 0.538                               | 0.528                               | CHEMBL3797085             |
| 11a                | CHEMBL3799183    | 0.538                               | 0.528                               | CHEMBL3797085             |
| 11a                | CHEMBL4160296    | 0.492                               | 0.528                               | CHEMBL4130365             |
| 11a                | CHEMBL4168213    | 0.422                               | 0.528                               | CHEMBL4130365             |
| 11a                | CHEMBL4080014    | 0.618                               | 0.526                               | CHEMBL4033665             |
| 11a                | CHEMBL2170177    | 0.615                               | 0.526                               | CHEMBL4616727             |
| 11a                | CHEMBL4225495    | 0.758                               | 0.525                               | CHEMBL4219109             |
| 11a                | CHEMBL3652239    | 0.645                               | 0.515                               | CHEMBL3639071             |
| 11a                | CHEMBL3655907    | 0.625                               | 0.515                               | CHEMBL3639071             |
| 11a                | CHEMBL3652226    | 0.615                               | 0.515                               | CHEMBL3639071             |
| 11a                | CHEMBL3652238    | 0.609                               | 0.515                               | CHEMBL3639071             |
| 11a                | CHEMBL4064437    | 0.661                               | 0.514                               | CHEMBL4024792             |
| 11a                | CHEMBL2170166    | 0.603                               | 0.514                               | CHEMBL3639018             |
| 11a                | CHEMBL3948680    | 0.594                               | 0.514                               | CHEMBL3886619             |
| 11a                | CHEMBL4280808    | 0.662                               | 0.513                               | CHEMBL4261629             |
| 11a                | CHEMBL4282039    | 0.603                               | 0.513                               | CHEMBL4261629             |
| 11a                | CHEMBL4537561    | 0.562                               | 0.513                               | CHEMBL4422610             |
| 11a                | CHEMBL4100664    | 0.556                               | 0.513                               | CHEMBL3994606             |

|     |               |       |       |               |
|-----|---------------|-------|-------|---------------|
| 11a | CHEMBL4069287 | 0.532 | 0.513 | CHEMBL4033665 |
| 11a | CHEMBL4206021 | 0.627 | 0.512 | CHEMBL4196108 |
| 11a | CHEMBL2425970 | 0.614 | 0.512 | CHEMBL2424579 |
| 11a | CHEMBL2425971 | 0.614 | 0.512 | CHEMBL2424579 |
| 11a | CHEMBL3217996 | 0.565 | 0.512 | CHEMBL3217617 |
| 11a | CHEMBL3217999 | 0.565 | 0.512 | CHEMBL3217617 |
| 11a | CHEMBL3217995 | 0.547 | 0.512 | CHEMBL3217617 |
| 11a | CHEMBL3217998 | 0.547 | 0.512 | CHEMBL3217617 |
| 11a | CHEMBL4228987 | 0.758 | 0.5   | CHEMBL4219109 |
| 11a | CHEMBL1630117 | 0.754 | 0.5   | CHEMBL1629443 |
| 11a | CHEMBL4529251 | 0.719 | 0.5   | CHEMBL4414648 |
| 11a | CHEMBL4535144 | 0.719 | 0.5   | CHEMBL4414648 |
| 11a | CHEMBL1630118 | 0.7   | 0.5   | CHEMBL1629443 |
| 11a | CHEMBL4551484 | 0.688 | 0.5   | CHEMBL4414648 |
| 11a | CHEMBL3314862 | 0.683 | 0.5   | CHEMBL3351281 |
| 11a | CHEMBL4464235 | 0.672 | 0.5   | CHEMBL4414648 |
| 11a | CHEMBL3652243 | 0.662 | 0.5   | CHEMBL3639071 |
| 11a | CHEMBL4093718 | 0.661 | 0.5   | CHEMBL4024792 |
| 11a | CHEMBL4556111 | 0.657 | 0.5   | CHEMBL4354804 |
| 11a | CHEMBL3218000 | 0.651 | 0.5   | CHEMBL3217617 |
| 11a | CHEMBL4531802 | 0.643 | 0.5   | CHEMBL4385610 |
| 11a | CHEMBL3652225 | 0.639 | 0.5   | CHEMBL3639071 |
| 11a | CHEMBL3217993 | 0.631 | 0.5   | CHEMBL3217617 |
| 11a | CHEMBL4277089 | 0.631 | 0.5   | CHEMBL4261629 |
| 11a | CHEMBL3926575 | 0.627 | 0.5   | CHEMBL3886619 |
| 11a | CHEMBL3652231 | 0.615 | 0.5   | CHEMBL3639071 |
| 11a | CHEMBL3652240 | 0.615 | 0.5   | CHEMBL3639071 |
| 11a | CHEMBL2425952 | 0.614 | 0.5   | CHEMBL2424579 |
| 11a | CHEMBL3952983 | 0.611 | 0.5   | CHEMBL3886619 |
| 11a | CHEMBL4214369 | 0.609 | 0.5   | CHEMBL4196108 |
| 11a | CHEMBL4475240 | 0.606 | 0.5   | CHEMBL4385610 |
| 11a | CHEMBL4209463 | 0.603 | 0.5   | CHEMBL4196108 |
| 11a | CHEMBL4560818 | 0.594 | 0.5   | CHEMBL4414648 |
| 11a | CHEMBL2018304 | 0.592 | 0.5   | CHEMBL2016572 |
| 11a | CHEMBL2018450 | 0.592 | 0.5   | CHEMBL2016572 |
| 11a | CHEMBL4206537 | 0.591 | 0.5   | CHEMBL4196108 |
| 11a | CHEMBL4438279 | 0.586 | 0.5   | CHEMBL4385610 |
| 11a | CHEMBL4215954 | 0.576 | 0.5   | CHEMBL4196108 |
| 11a | CHEMBL3898702 | 0.567 | 0.5   | CHEMBL3886619 |
| 11a | CHEMBL4468860 | 0.565 | 0.5   | CHEMBL4385610 |
| 11a | CHEMBL482094  | 0.448 | 0.5   | CHEMBL1155020 |
| 11a | CHEMBL4441436 | 0.643 | 0.488 | CHEMBL4330076 |
| 11a | CHEMBL4541796 | 0.636 | 0.488 | CHEMBL4385610 |
| 11a | CHEMBL4218266 | 0.631 | 0.488 | CHEMBL4196108 |
| 11a | CHEMBL4517827 | 0.629 | 0.488 | CHEMBL4330076 |
| 11a | CHEMBL4464975 | 0.616 | 0.488 | CHEMBL4330076 |
| 11a | CHEMBL4565933 | 0.616 | 0.488 | CHEMBL4330076 |
| 11a | CHEMBL4442777 | 0.603 | 0.488 | CHEMBL4330076 |
| 11a | CHEMBL4470654 | 0.603 | 0.488 | CHEMBL4330076 |

|     |               |       |       |               |
|-----|---------------|-------|-------|---------------|
| 11a | CHEMBL4579683 | 0.603 | 0.488 | CHEMBL4330076 |
| 11a | CHEMBL3217994 | 0.569 | 0.488 | CHEMBL3217617 |
| 11a | CHEMBL3217997 | 0.569 | 0.488 | CHEMBL3217617 |
| 11a | CHEMBL3314869 | 0.625 | 0.487 | CHEMBL3351281 |
| 11a | CHEMBL4470067 | 0.623 | 0.487 | CHEMBL4385610 |
| 11a | CHEMBL4445881 | 0.58  | 0.487 | CHEMBL4385610 |
| 11a | CHEMBL4066920 | 0.565 | 0.487 | CHEMBL4385610 |
| 11a | CHEMBL4563723 | 0.725 | 0.486 | CHEMBL4346670 |
| 11a | CHEMBL3655910 | 0.636 | 0.486 | CHEMBL3639071 |
| 11a | CHEMBL3652242 | 0.625 | 0.486 | CHEMBL3639071 |
| 11b | CHEMBL3655929 | 0.844 | 0.515 | CHEMBL3639071 |
| 11b | CHEMBL3655997 | 0.831 | 0.472 | CHEMBL3639071 |
| 11b | CHEMBL4225495 | 0.758 | 0.538 | CHEMBL4219109 |
| 11b | CHEMBL4228987 | 0.758 | 0.513 | CHEMBL4219109 |
| 11b | CHEMBL1630117 | 0.754 | 0.478 | CHEMBL1629443 |
| 11b | CHEMBL3601776 | 0.734 | 0.538 | CHEMBL3600352 |
| 11b | CHEMBL4563723 | 0.725 | 0.5   | CHEMBL4346670 |
| 11b | CHEMBL4529251 | 0.719 | 0.475 | CHEMBL4414648 |
| 11b | CHEMBL4535144 | 0.719 | 0.475 | CHEMBL4414648 |
| 11b | CHEMBL1630118 | 0.7   | 0.478 | CHEMBL1629443 |
| 11b | CHEMBL3314863 | 0.683 | 0.571 | CHEMBL3351281 |
| 11b | CHEMBL3909186 | 0.683 | 0.5   | CHEMBL3886619 |
| 11b | CHEMBL3909854 | 0.683 | 0.5   | CHEMBL3886619 |
| 11b | CHEMBL3314862 | 0.683 | 0.475 | CHEMBL3351281 |
| 11b | CHEMBL3601777 | 0.677 | 0.611 | CHEMBL3600352 |
| 11b | CHEMBL4073165 | 0.677 | 0.5   | CHEMBL4024792 |
| 11b | CHEMBL4439302 | 0.672 | 0.485 | CHEMBL4414648 |
| 11b | CHEMBL3652229 | 0.667 | 0.485 | CHEMBL3639071 |
| 11b | CHEMBL4280808 | 0.662 | 0.526 | CHEMBL4261629 |
| 11b | CHEMBL3652243 | 0.662 | 0.515 | CHEMBL3639071 |
| 11b | CHEMBL4061807 | 0.661 | 0.5   | CHEMBL4024792 |
| 11b | CHEMBL4079874 | 0.661 | 0.5   | CHEMBL4024792 |
| 11b | CHEMBL4064437 | 0.661 | 0.486 | CHEMBL4024792 |
| 11b | CHEMBL4556111 | 0.657 | 0.474 | CHEMBL4354804 |
| 11b | CHEMBL3655914 | 0.656 | 0.515 | CHEMBL3639071 |
| 11b | CHEMBL3652228 | 0.656 | 0.5   | CHEMBL3639071 |
| 11b | CHEMBL3218000 | 0.651 | 0.476 | CHEMBL3217617 |
| 11b | CHEMBL3918660 | 0.646 | 0.528 | CHEMBL3886619 |
| 11b | CHEMBL3652239 | 0.645 | 0.531 | CHEMBL3639071 |
| 11b | CHEMBL3798183 | 0.645 | 0.528 | CHEMBL3797085 |
| 11b | CHEMBL4068310 | 0.645 | 0.5   | CHEMBL4024792 |
| 11b | CHEMBL4531802 | 0.643 | 0.474 | CHEMBL4385610 |
| 11b | CHEMBL3655910 | 0.636 | 0.5   | CHEMBL3639071 |
| 11b | CHEMBL3927508 | 0.635 | 0.5   | CHEMBL3886619 |
| 11b | CHEMBL4073021 | 0.633 | 0.576 | CHEMBL4024792 |
| 11b | CHEMBL4210907 | 0.631 | 0.512 | CHEMBL4196108 |
| 11b | CHEMBL4218266 | 0.631 | 0.5   | CHEMBL4196108 |
| 11b | CHEMBL3217993 | 0.631 | 0.475 | CHEMBL3217617 |
| 11b | CHEMBL4277089 | 0.631 | 0.474 | CHEMBL4261629 |

|     |               |       |       |               |
|-----|---------------|-------|-------|---------------|
| 11b | CHEMBL3970950 | 0.629 | 0.485 | CHEMBL3886619 |
| 11b | CHEMBL4206021 | 0.627 | 0.525 | CHEMBL4196108 |
| 11b | CHEMBL3926575 | 0.627 | 0.474 | CHEMBL3886619 |
| 11b | CHEMBL3655907 | 0.625 | 0.531 | CHEMBL3639071 |
| 11b | CHEMBL3655909 | 0.625 | 0.486 | CHEMBL3639071 |
| 11b | CHEMBL4080014 | 0.618 | 0.5   | CHEMBL4033665 |
| 11b | CHEMBL4288702 | 0.618 | 0.475 | CHEMBL4261629 |
| 11b | CHEMBL2170177 | 0.615 | 0.541 | CHEMBL4616727 |
| 11b | CHEMBL3652226 | 0.615 | 0.531 | CHEMBL3639071 |
| 11b | CHEMBL3652234 | 0.615 | 0.5   | CHEMBL3639071 |
| 11b | CHEMBL3652236 | 0.615 | 0.5   | CHEMBL3639071 |
| 11b | CHEMBL3655908 | 0.615 | 0.486 | CHEMBL3639071 |
| 11b | CHEMBL2425970 | 0.614 | 0.488 | CHEMBL2424579 |
| 11b | CHEMBL2425971 | 0.614 | 0.488 | CHEMBL2424579 |
| 11b | CHEMBL2425952 | 0.614 | 0.476 | CHEMBL2424579 |
| 11b | CHEMBL3960564 | 0.612 | 0.514 | CHEMBL3886619 |
| 11b | CHEMBL4066975 | 0.612 | 0.475 | CHEMBL4041521 |
| 11b | CHEMBL3952983 | 0.611 | 0.475 | CHEMBL3886619 |
| 11b | CHEMBL3652238 | 0.609 | 0.531 | CHEMBL3639071 |
| 11b | CHEMBL3652237 | 0.609 | 0.515 | CHEMBL3639071 |
| 11b | CHEMBL4214369 | 0.609 | 0.512 | CHEMBL4196108 |
| 11b | CHEMBL3652227 | 0.609 | 0.5   | CHEMBL3639071 |
| 11b | CHEMBL3652230 | 0.609 | 0.5   | CHEMBL3639071 |
| 11b | CHEMBL4475240 | 0.606 | 0.474 | CHEMBL4385610 |
| 11b | CHEMBL4282039 | 0.603 | 0.526 | CHEMBL4261629 |
| 11b | CHEMBL4209463 | 0.603 | 0.513 | CHEMBL4196108 |
| 11b | CHEMBL3958794 | 0.603 | 0.5   | CHEMBL4385610 |
| 11b | CHEMBL2170166 | 0.603 | 0.486 | CHEMBL3639018 |
| 11b | CHEMBL3893799 | 0.6   | 0.528 | CHEMBL3886619 |
| 11b | CHEMBL4093691 | 0.6   | 0.476 | CHEMBL4041521 |
| 11b | CHEMBL4560818 | 0.594 | 0.515 | CHEMBL4414648 |
| 11b | CHEMBL3979548 | 0.594 | 0.5   | CHEMBL3886619 |
| 11b | CHEMBL3948680 | 0.594 | 0.486 | CHEMBL3886619 |
| 11b | CHEMBL2018304 | 0.592 | 0.474 | CHEMBL2016572 |
| 11b | CHEMBL2018450 | 0.592 | 0.474 | CHEMBL2016572 |
| 11b | CHEMBL4206537 | 0.591 | 0.513 | CHEMBL4196108 |
| 11b | CHEMBL4466930 | 0.588 | 0.514 | CHEMBL4385610 |
| 11b | CHEMBL4438279 | 0.586 | 0.474 | CHEMBL4385610 |
| 11b | CHEMBL2018295 | 0.583 | 0.488 | CHEMBL2016572 |
| 11b | CHEMBL2018296 | 0.583 | 0.488 | CHEMBL2016572 |
| 11b | CHEMBL3971436 | 0.582 | 0.5   | CHEMBL4385610 |
| 11b | CHEMBL2018300 | 0.581 | 0.488 | CHEMBL2016572 |
| 11b | CHEMBL2018301 | 0.581 | 0.488 | CHEMBL2016572 |
| 11b | CHEMBL4215954 | 0.576 | 0.513 | CHEMBL4196108 |
| 11b | CHEMBL4103801 | 0.574 | 0.474 | CHEMBL4033665 |
| 11b | CHEMBL3217996 | 0.565 | 0.488 | CHEMBL3217617 |
| 11b | CHEMBL3217999 | 0.565 | 0.488 | CHEMBL3217617 |
| 11b | CHEMBL4468860 | 0.565 | 0.474 | CHEMBL4385610 |
| 11b | CHEMBL4537561 | 0.562 | 0.526 | CHEMBL4422610 |

|            |               |       |       |               |
|------------|---------------|-------|-------|---------------|
| <b>11b</b> | CHEMBL4100664 | 0.556 | 0.487 | CHEMBL3994606 |
| <b>11b</b> | CHEMBL3976023 | 0.556 | 0.485 | CHEMBL3886619 |
| <b>11b</b> | CHEMBL3217995 | 0.547 | 0.488 | CHEMBL3217617 |
| <b>11b</b> | CHEMBL3217998 | 0.547 | 0.488 | CHEMBL3217617 |
| <b>11b</b> | CHEMBL3798027 | 0.538 | 0.5   | CHEMBL3797085 |
| <b>11b</b> | CHEMBL3799183 | 0.538 | 0.5   | CHEMBL3797085 |
| <b>11b</b> | CHEMBL4069287 | 0.532 | 0.487 | CHEMBL4033665 |
| <b>11b</b> | CHEMBL4531108 | 0.531 | 0.488 | CHEMBL4422610 |
| <b>11b</b> | CHEMBL4283105 | 0.525 | 0.488 | CHEMBL4422610 |
| <b>11b</b> | CHEMBL4160296 | 0.492 | 0.5   | CHEMBL4130365 |
| <b>11b</b> | CHEMBL482094  | 0.448 | 0.474 | CHEMBL1155020 |
| <b>11b</b> | CHEMBL4168213 | 0.422 | 0.5   | CHEMBL4130365 |

---

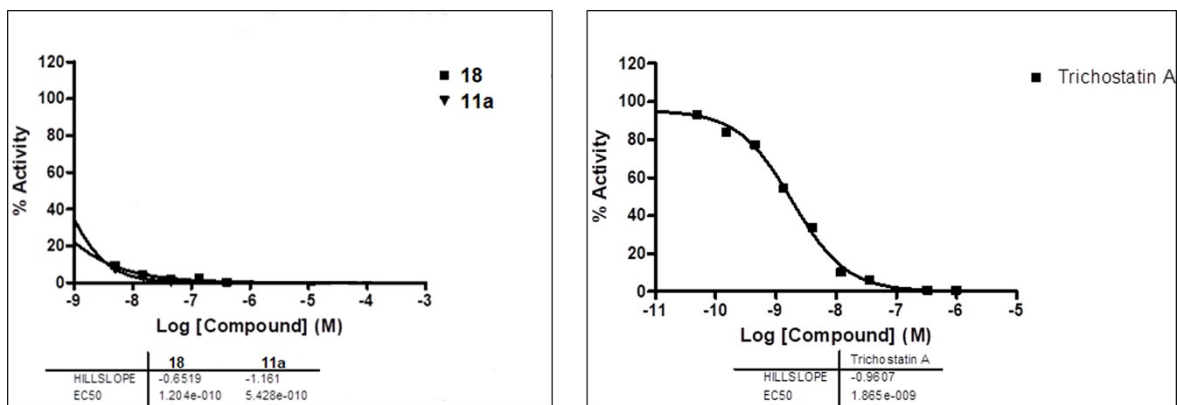

**Figure S1.** Dose response curves of **11a** and **18** tested against **HDAC6**. All compounds were tested in singlet 10-dose IC<sub>50</sub> mode with 3-fold serial dilution starting at 100  $\mu$ M. HDAC reference compound Trichostatin A (TSA) was tested in a 10-dose IC<sub>50</sub> with 3-fold serial dilution starting at 1  $\mu$ M. IC<sub>50</sub> values were calculated using the GraphPad Prism4 program based on a sigmoidal dose-response equation.

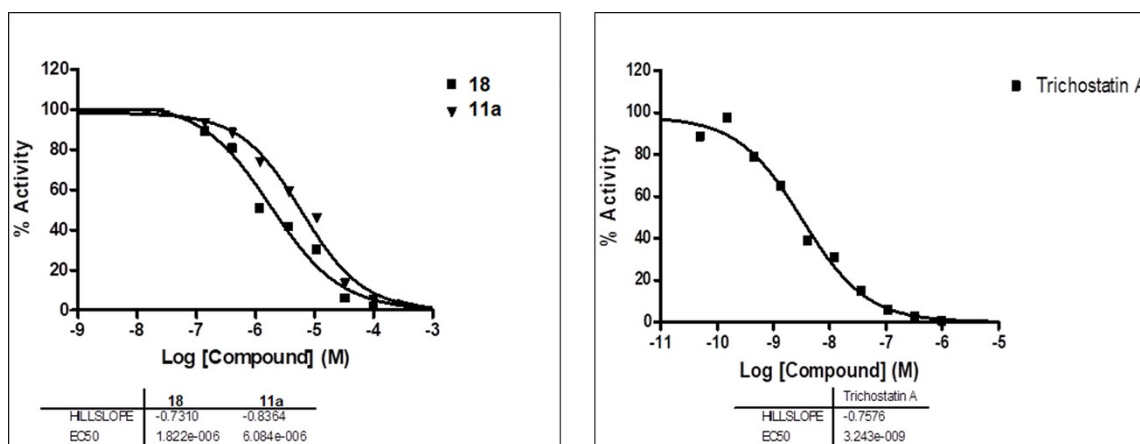

**Figure S2.** Dose response curves of **11a** and **18** tested against **HDAC1**. All compounds were tested in singlet 10-dose IC<sub>50</sub> mode with 3-fold serial dilution starting at 100  $\mu$ M. HDAC reference compound Trichostatin A (TSA) was tested in a 10-dose IC<sub>50</sub> with 3-fold serial dilution starting at 1  $\mu$ M. IC<sub>50</sub> values were calculated using the GraphPad Prism4 program based on a sigmoidal dose-response equation.

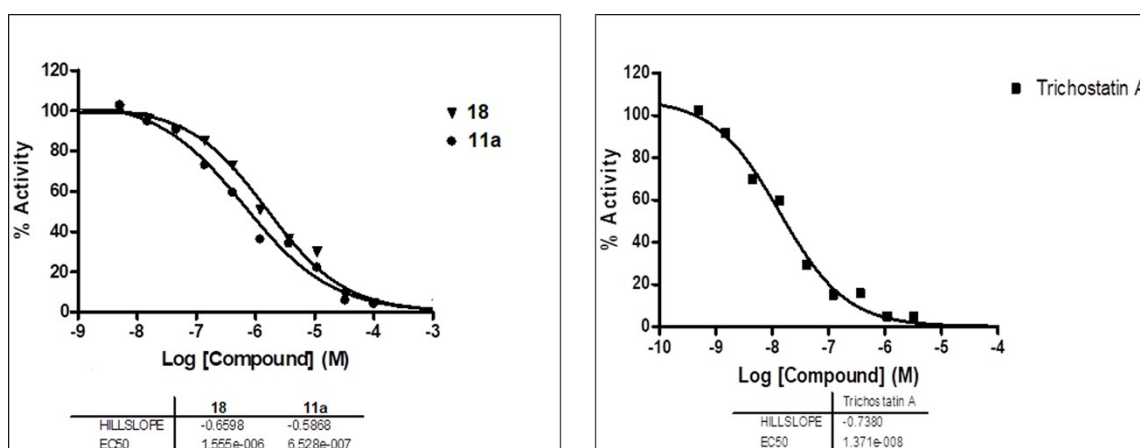

**Figure S3.** Dose response curves of **11a** and **18** tested against **HDAC8**. All compounds were tested in singlet 10-dose IC<sub>50</sub> mode with 3-fold serial dilution starting at 100  $\mu$ M. HDAC reference compound Trichostatin A (TSA) was tested in a 10-dose IC<sub>50</sub> with 3-fold serial dilution starting at 1  $\mu$ M. IC<sub>50</sub> values were calculated using the GraphPad Prism4 program based on a sigmoidal dose-response equation.



# $^1\text{H}$ , $^{13}\text{C}$ NMR Spectra for all compounds

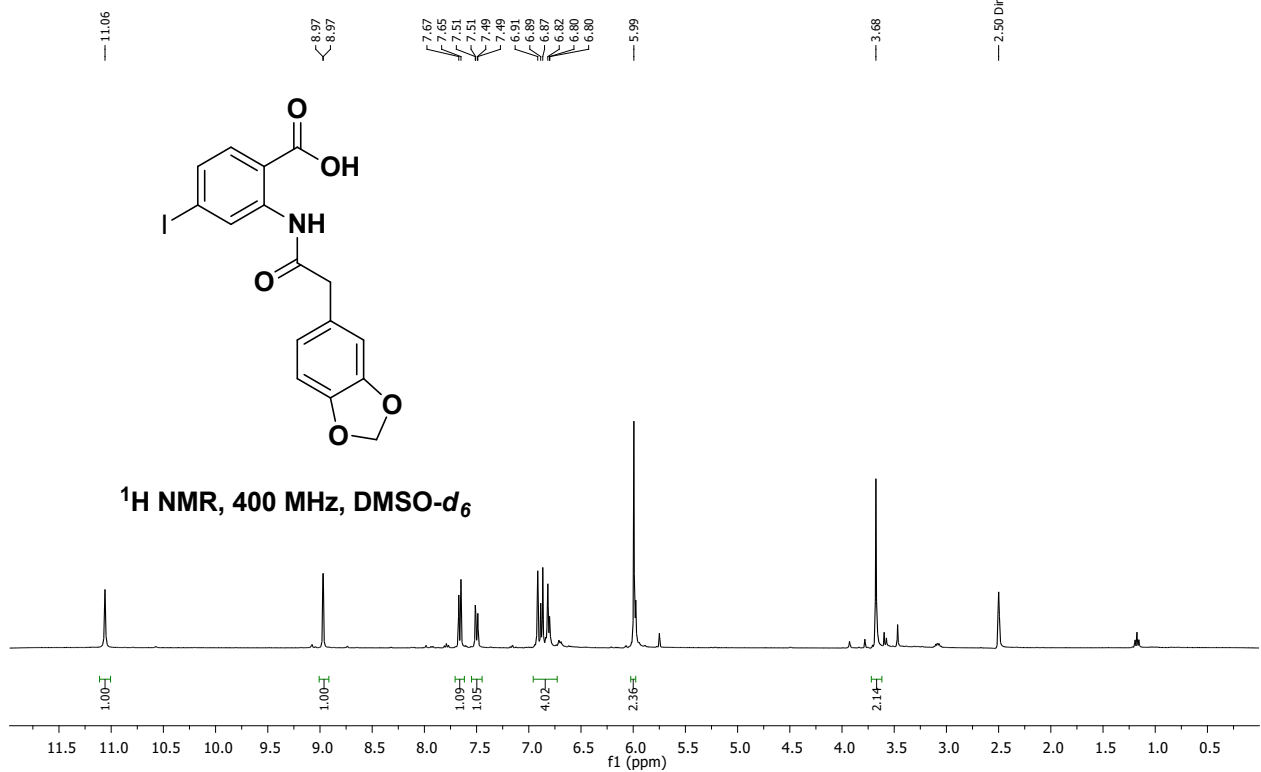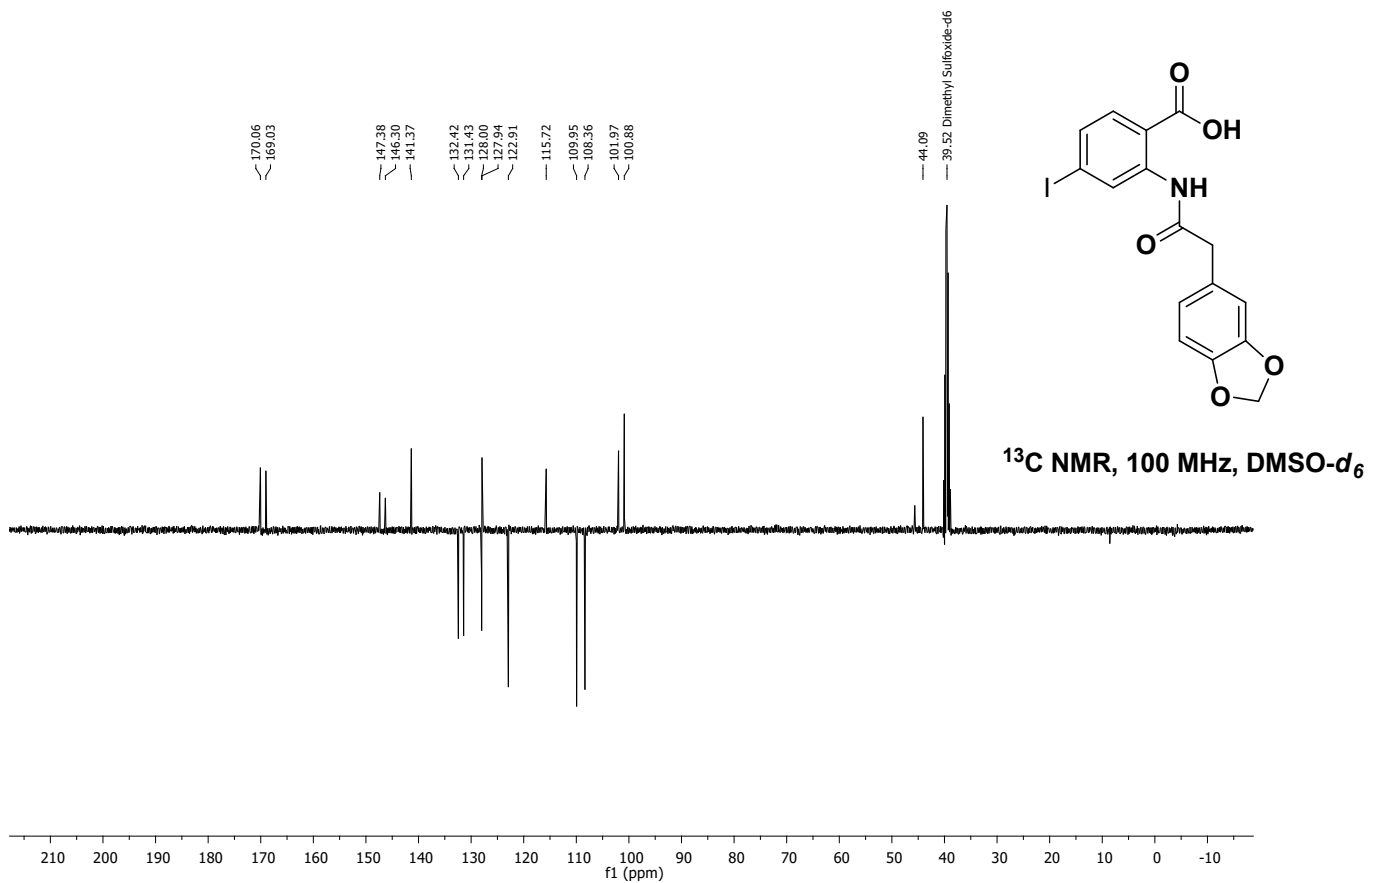

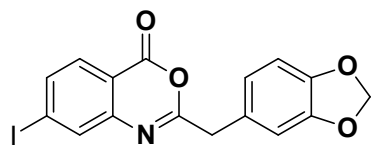

<sup>1</sup>H NMR, 400 MHz, DMSO-d<sub>6</sub>

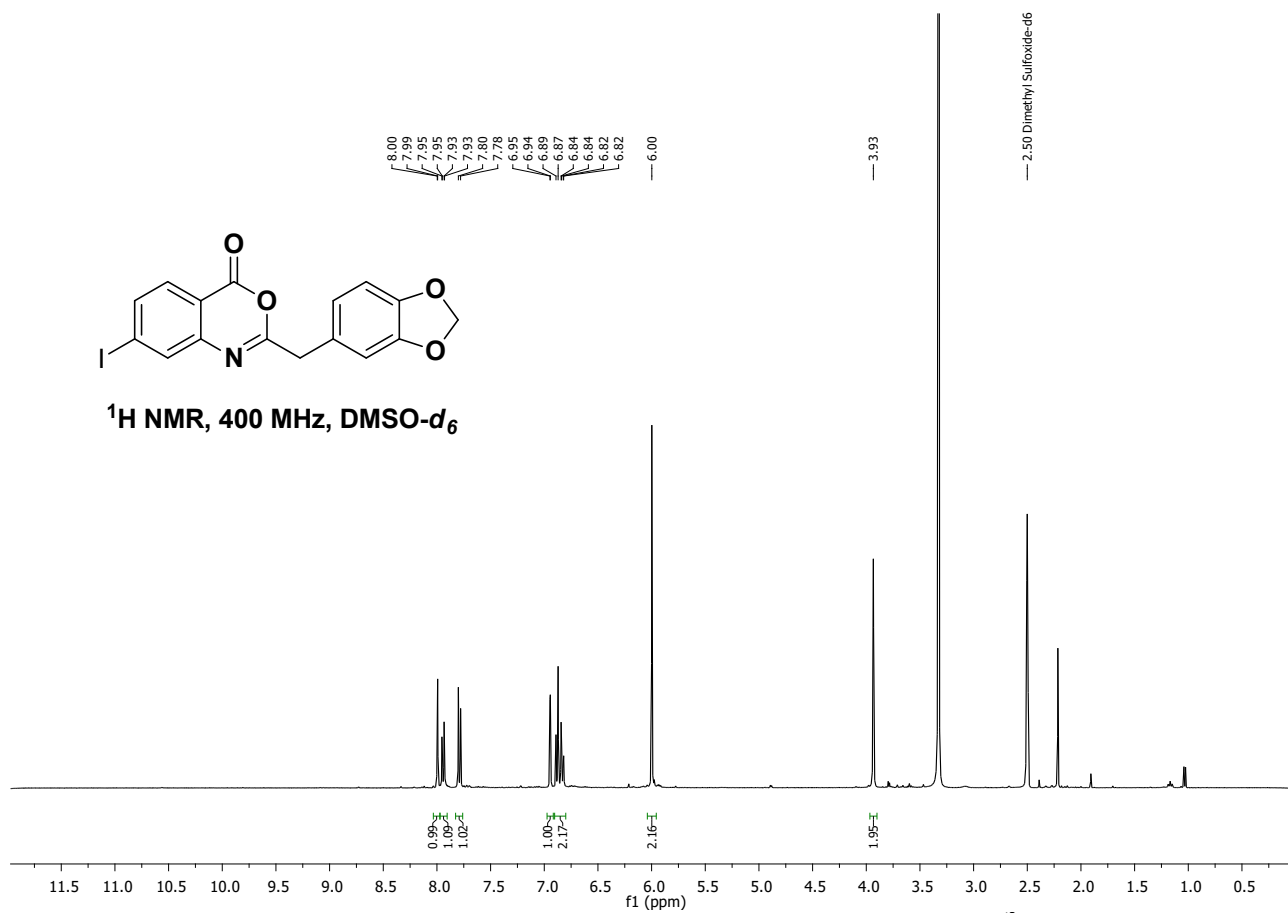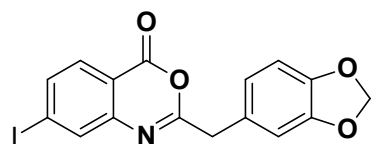

<sup>13</sup>C NMR, 100 MHz, DMSO-d<sub>6</sub>

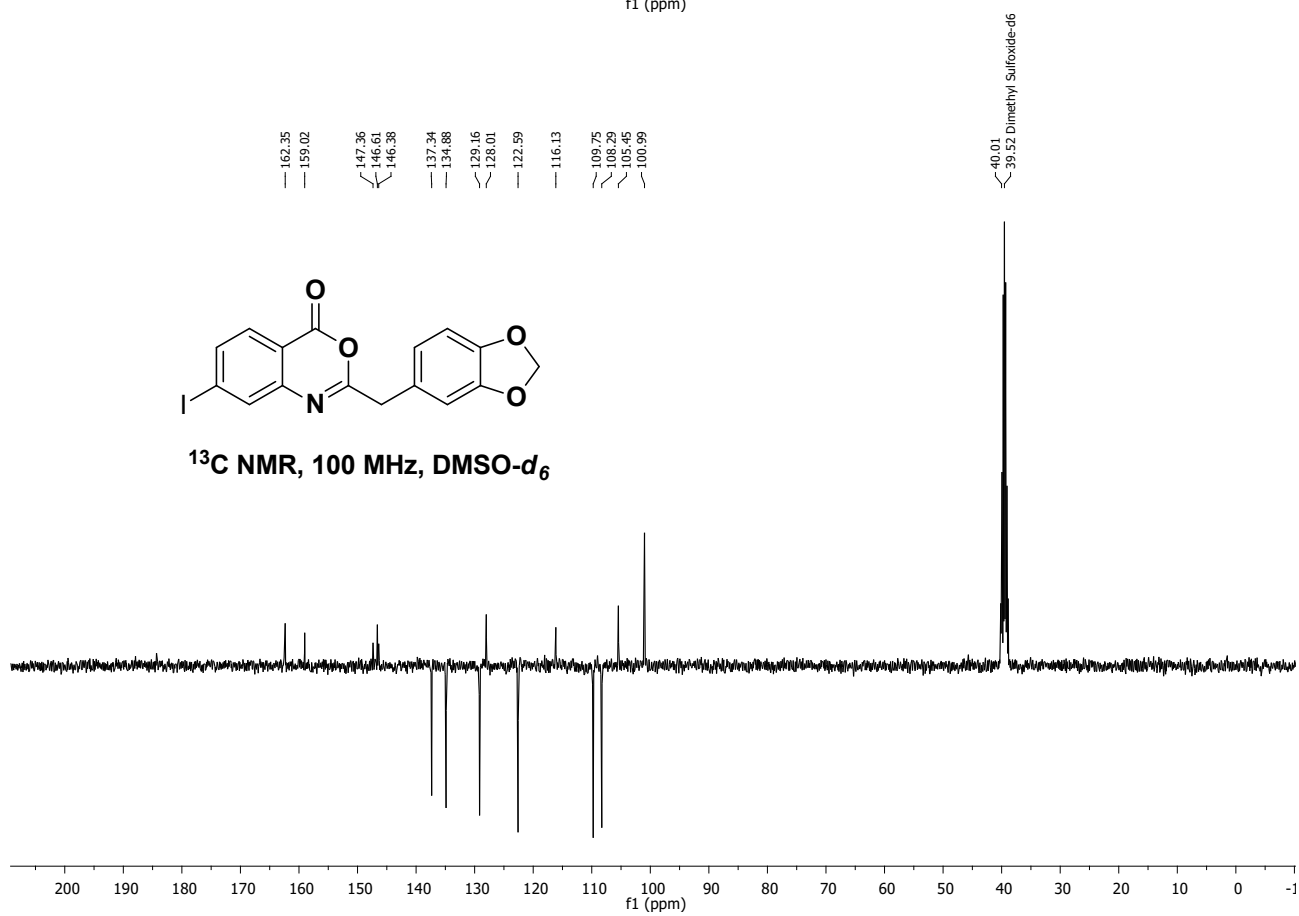

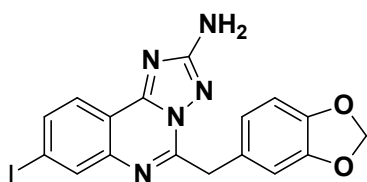

**<sup>1</sup>H NMR, 400 MHz, DMSO-d<sub>6</sub>**

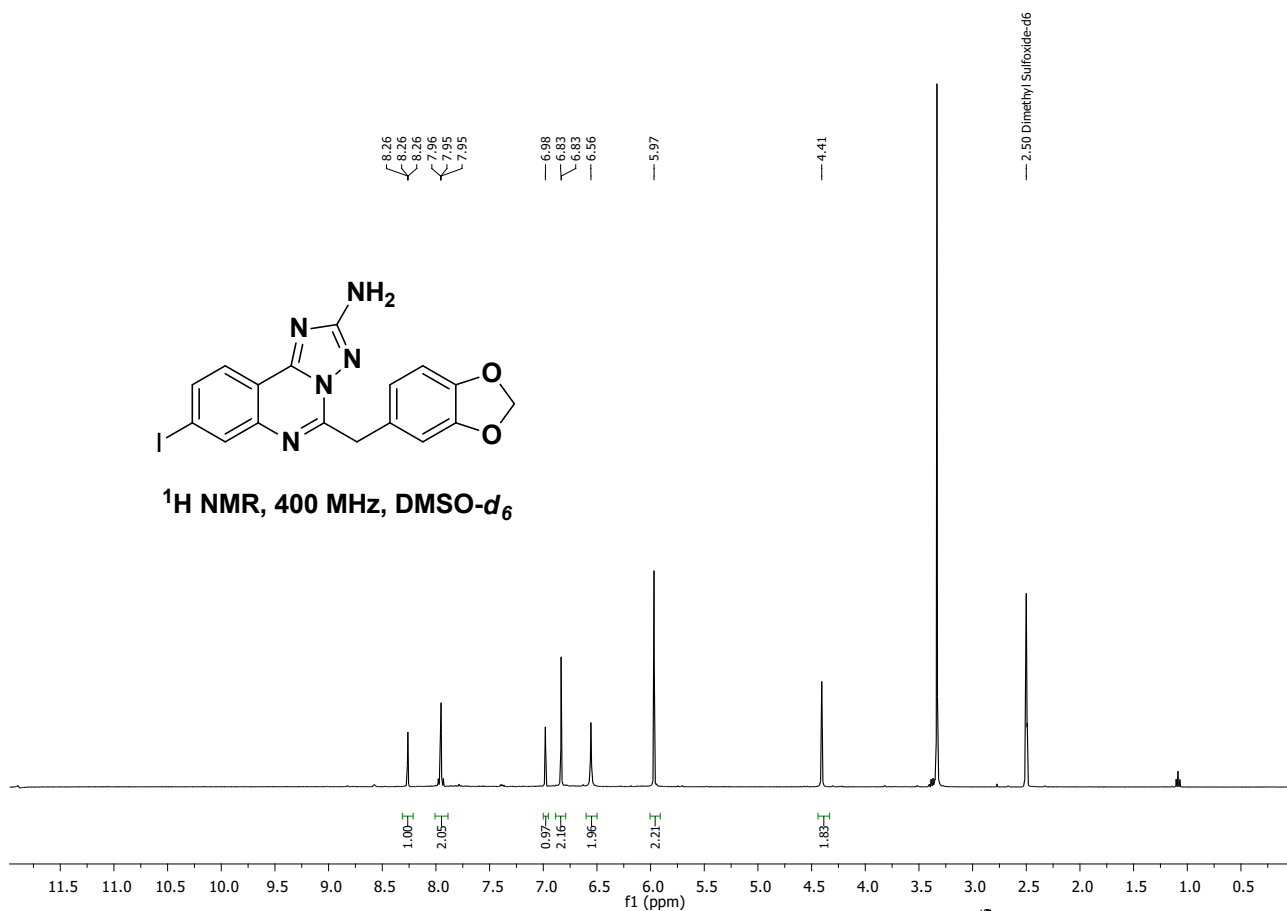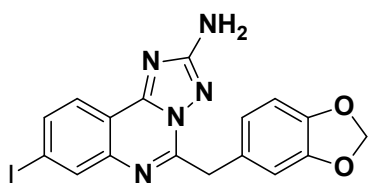

**<sup>13</sup>C NMR, 100 MHz, DMSO-d<sub>6</sub>**

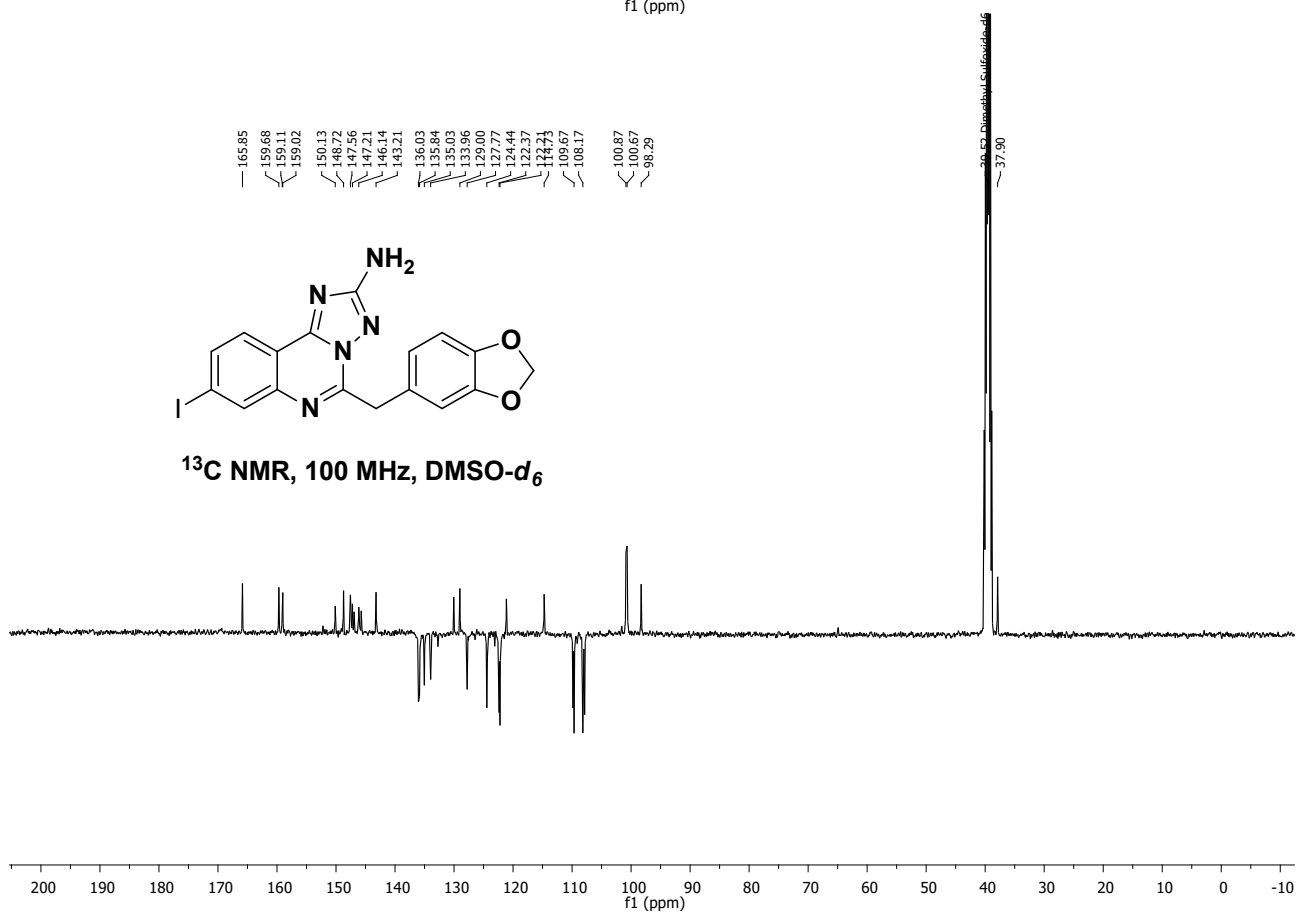

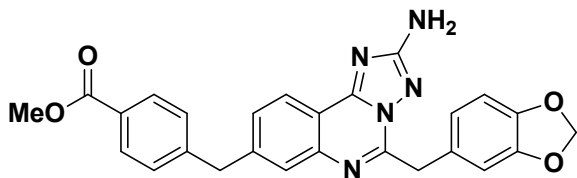

<sup>1</sup>H NMR, 400 MHz, DMSO-d<sub>6</sub>

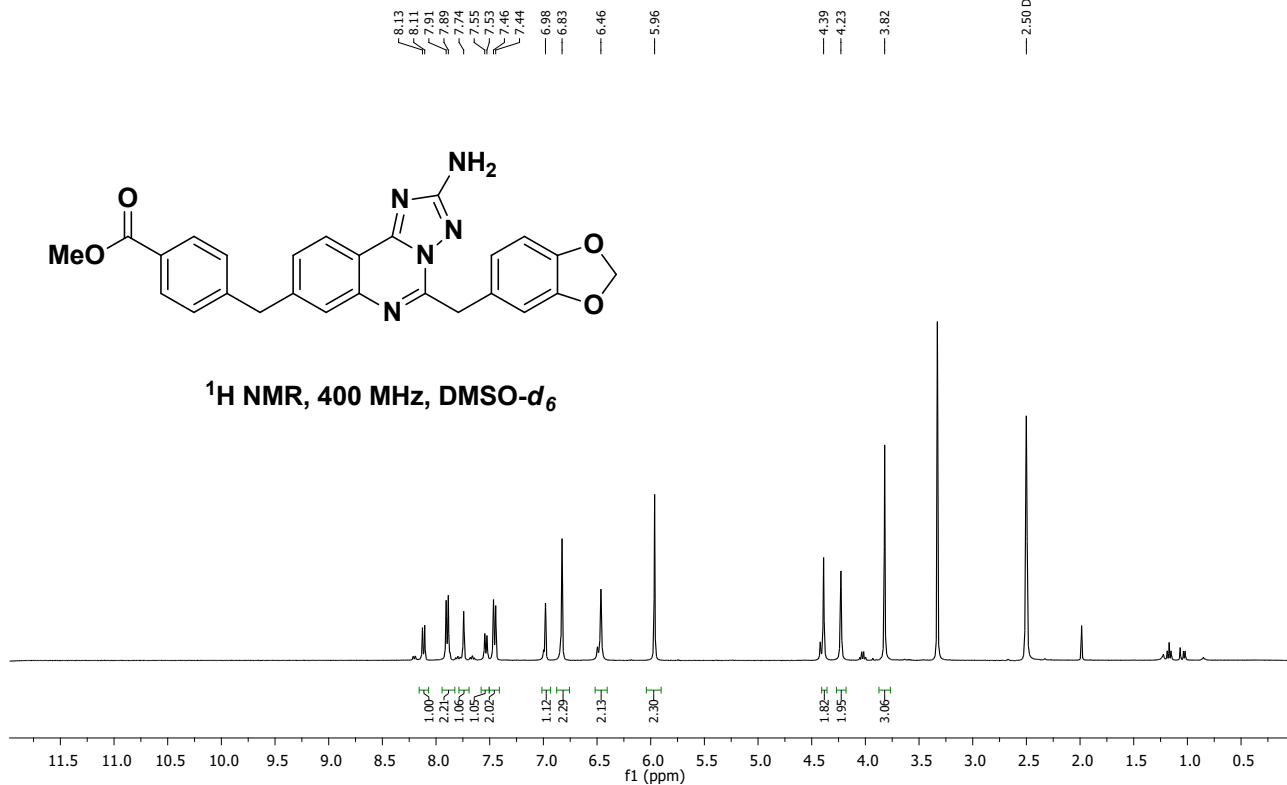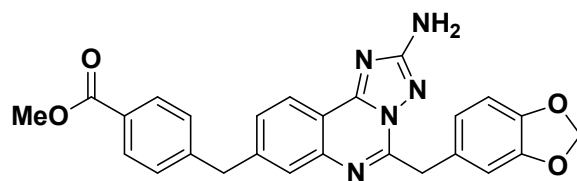

<sup>13</sup>C NMR, 100 MHz, DMSO-d<sub>6</sub>

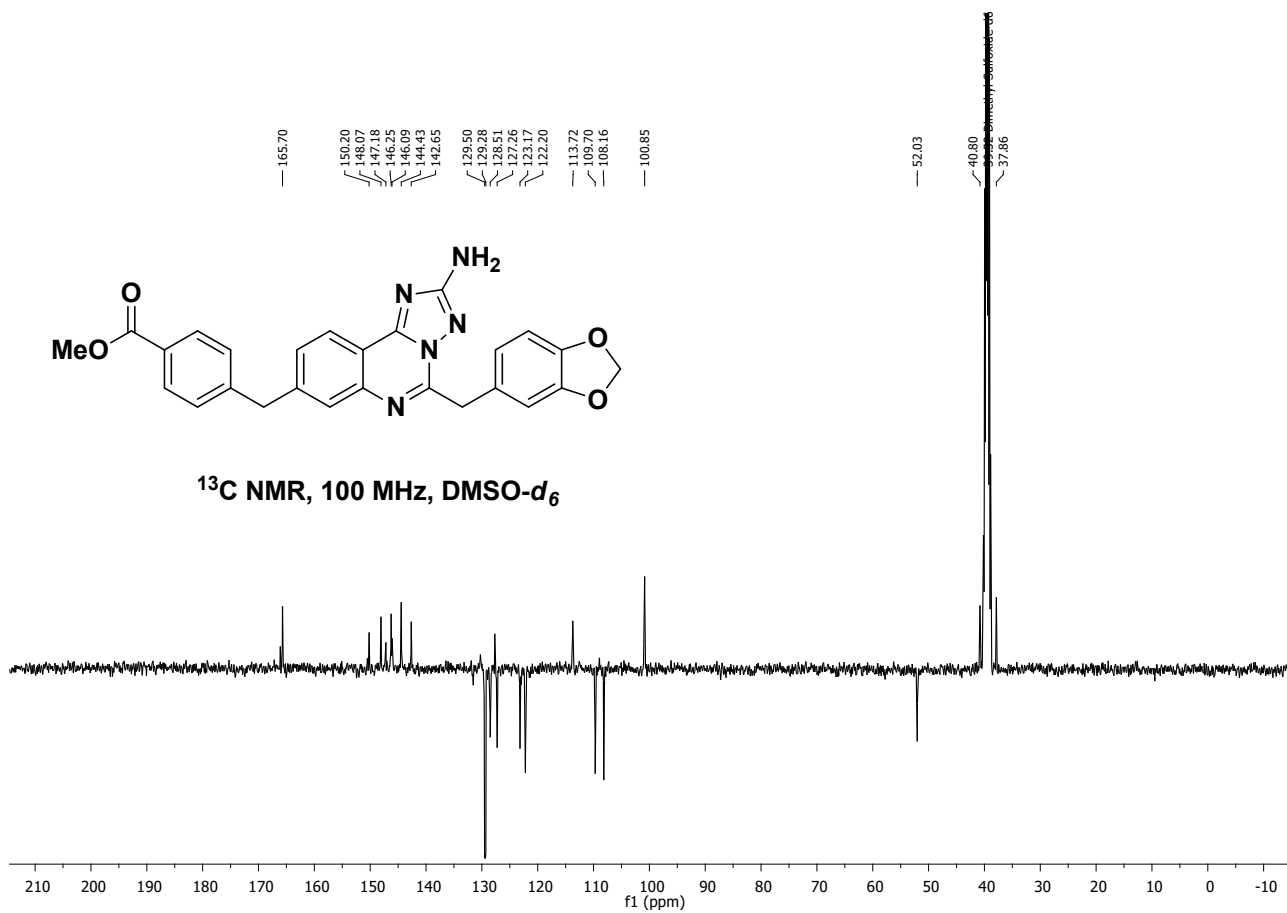

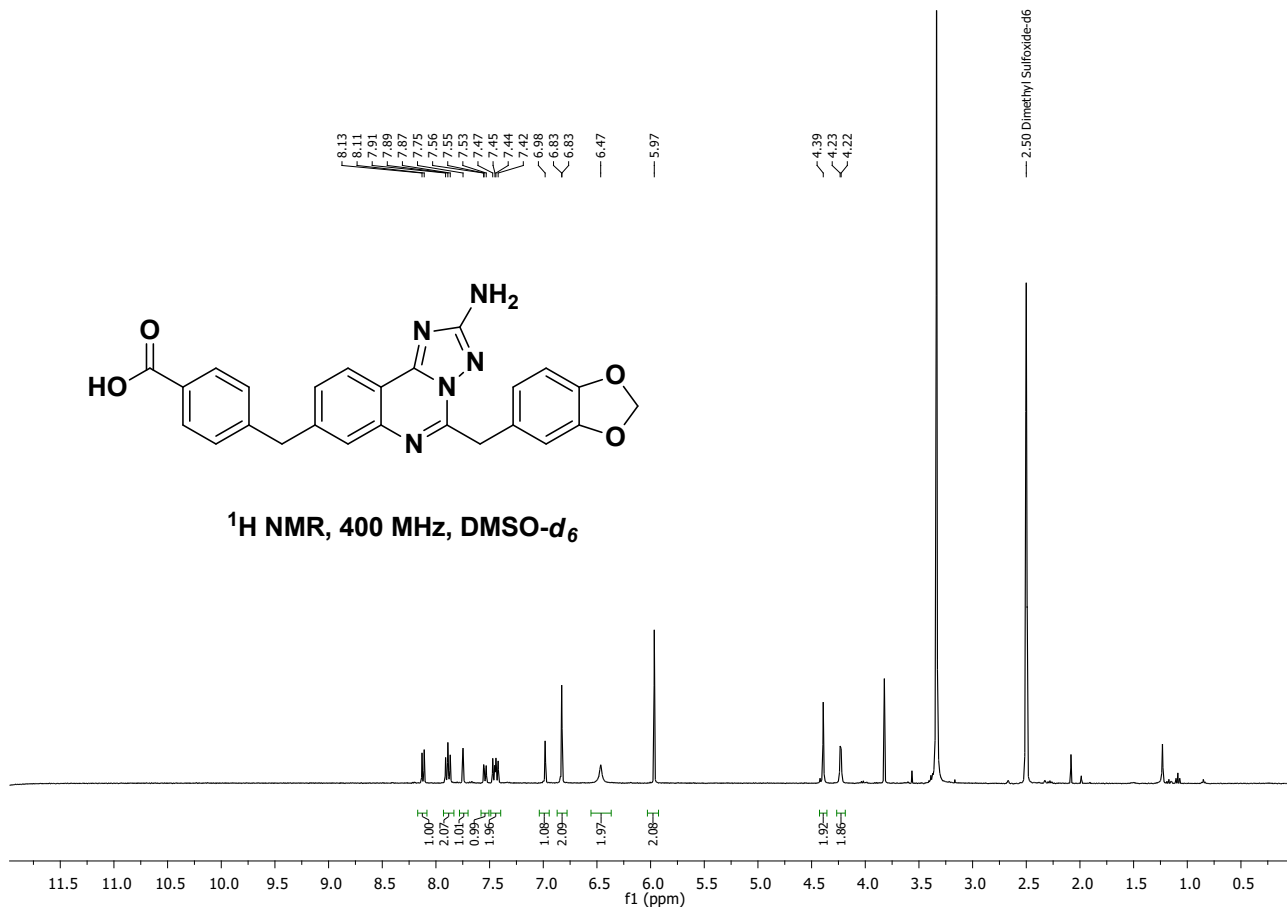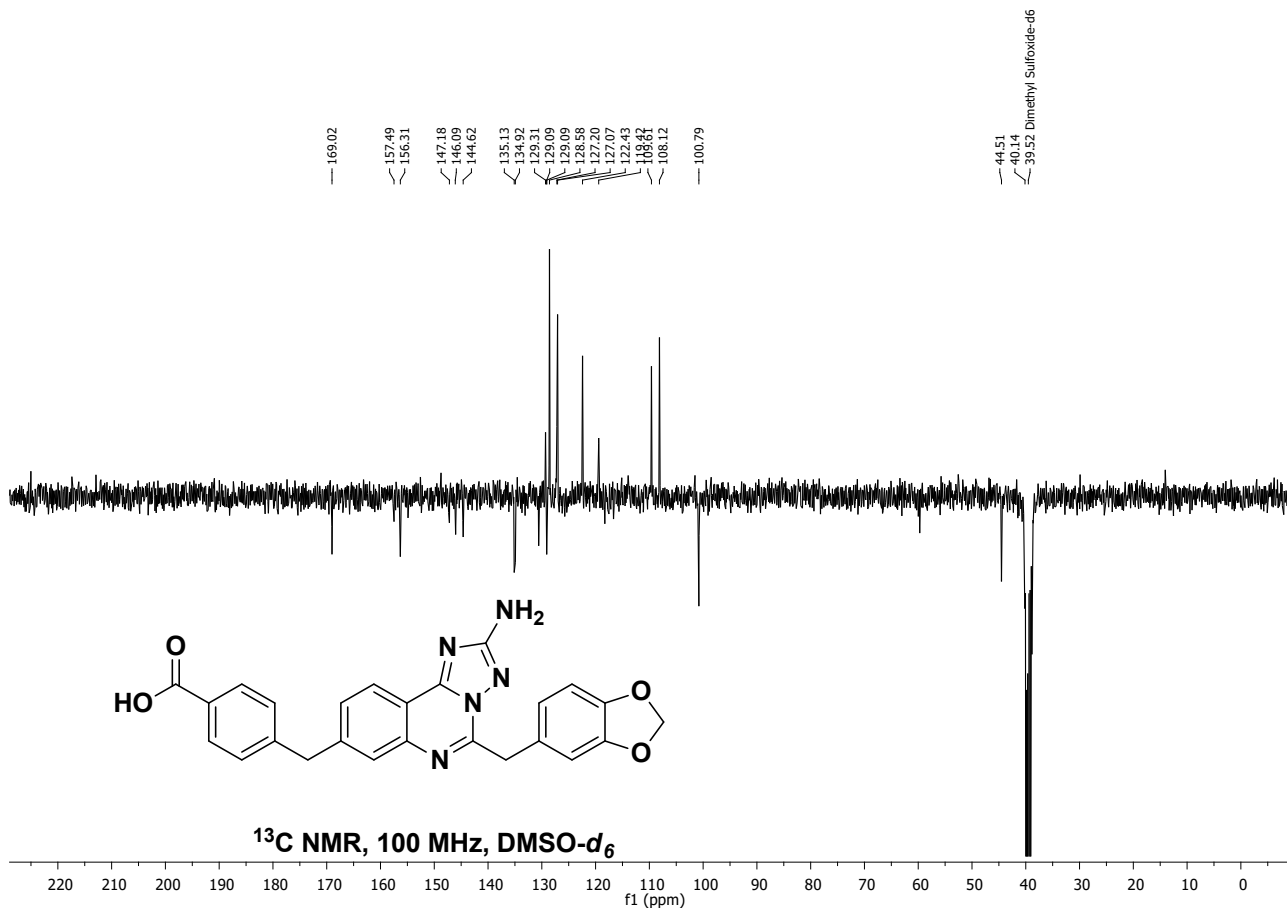

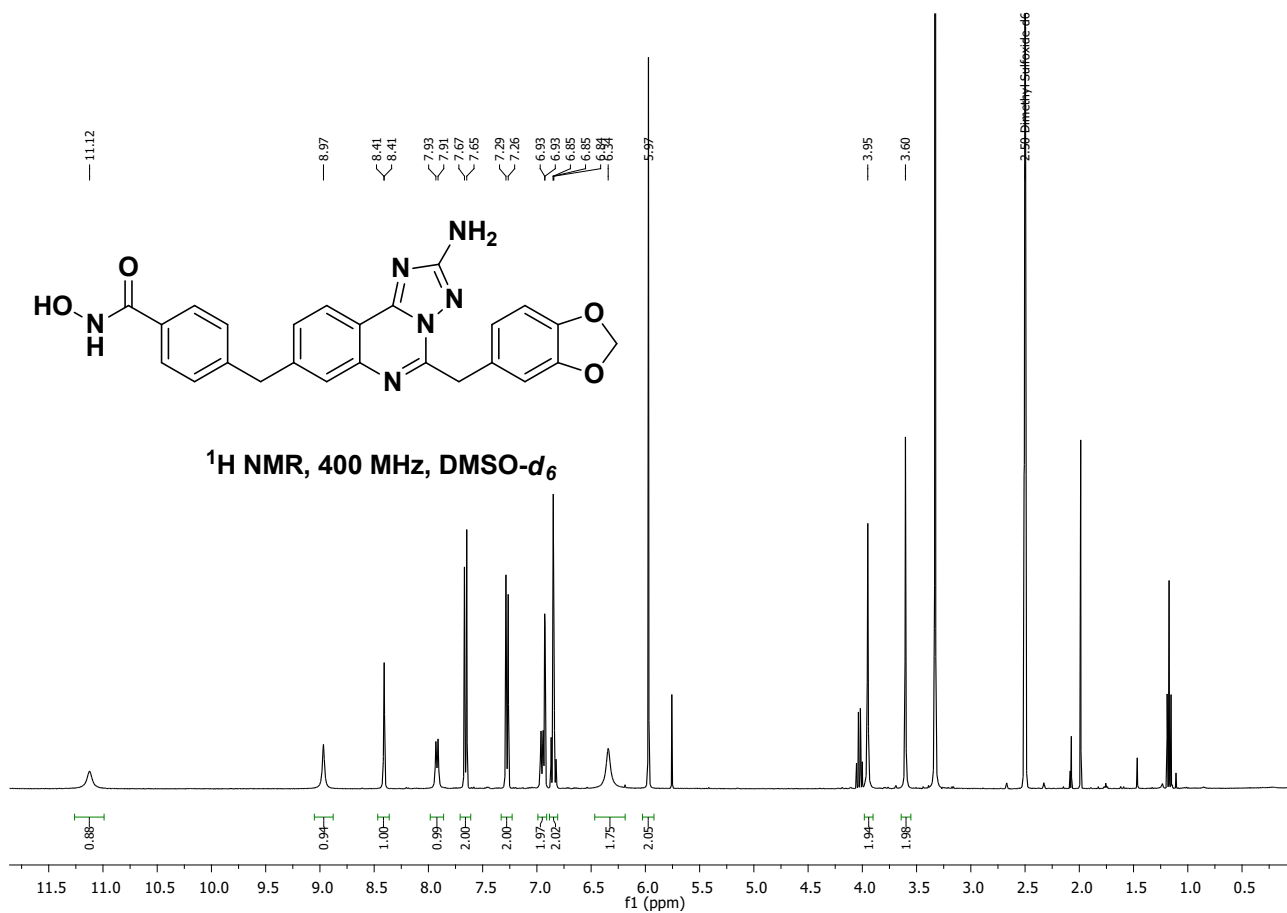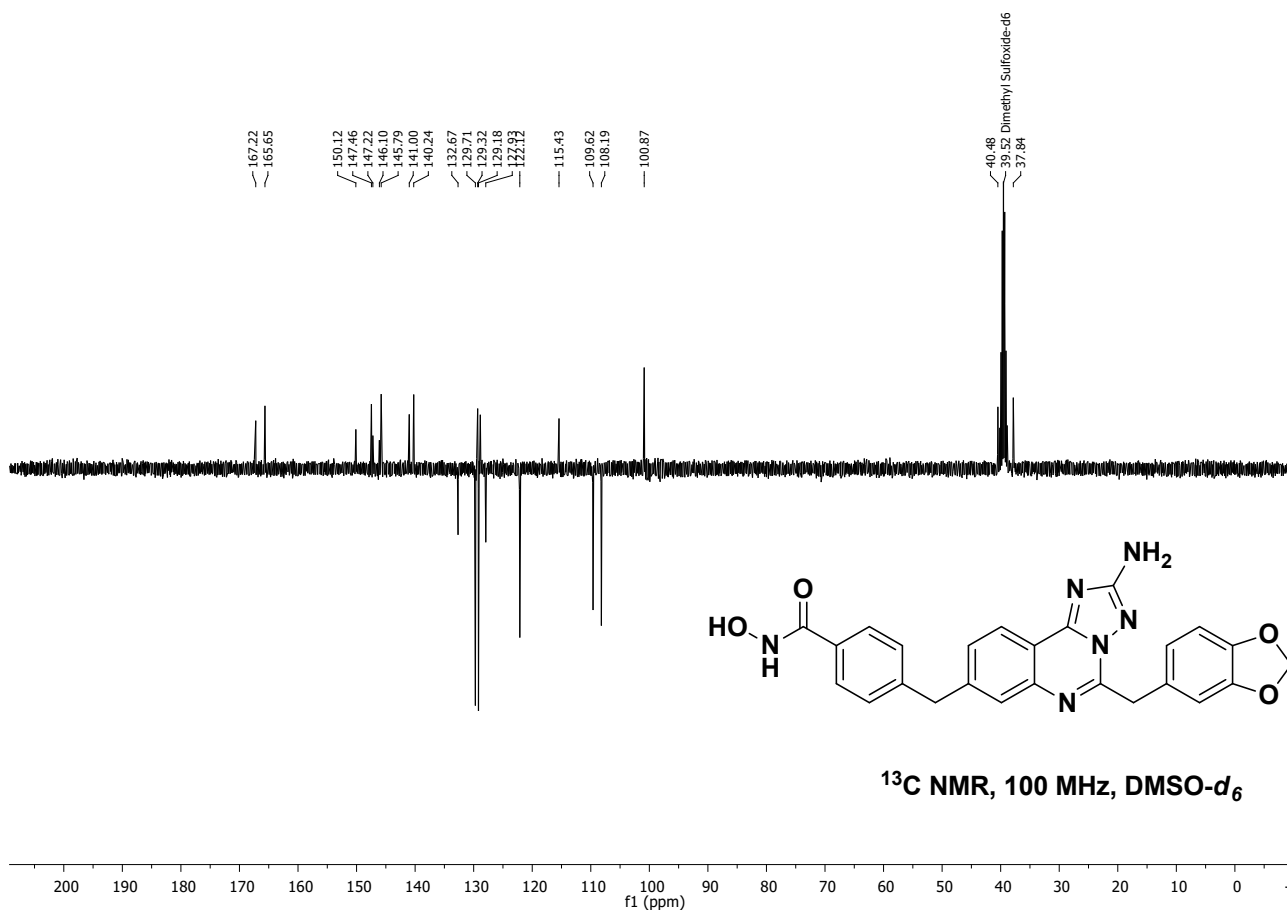

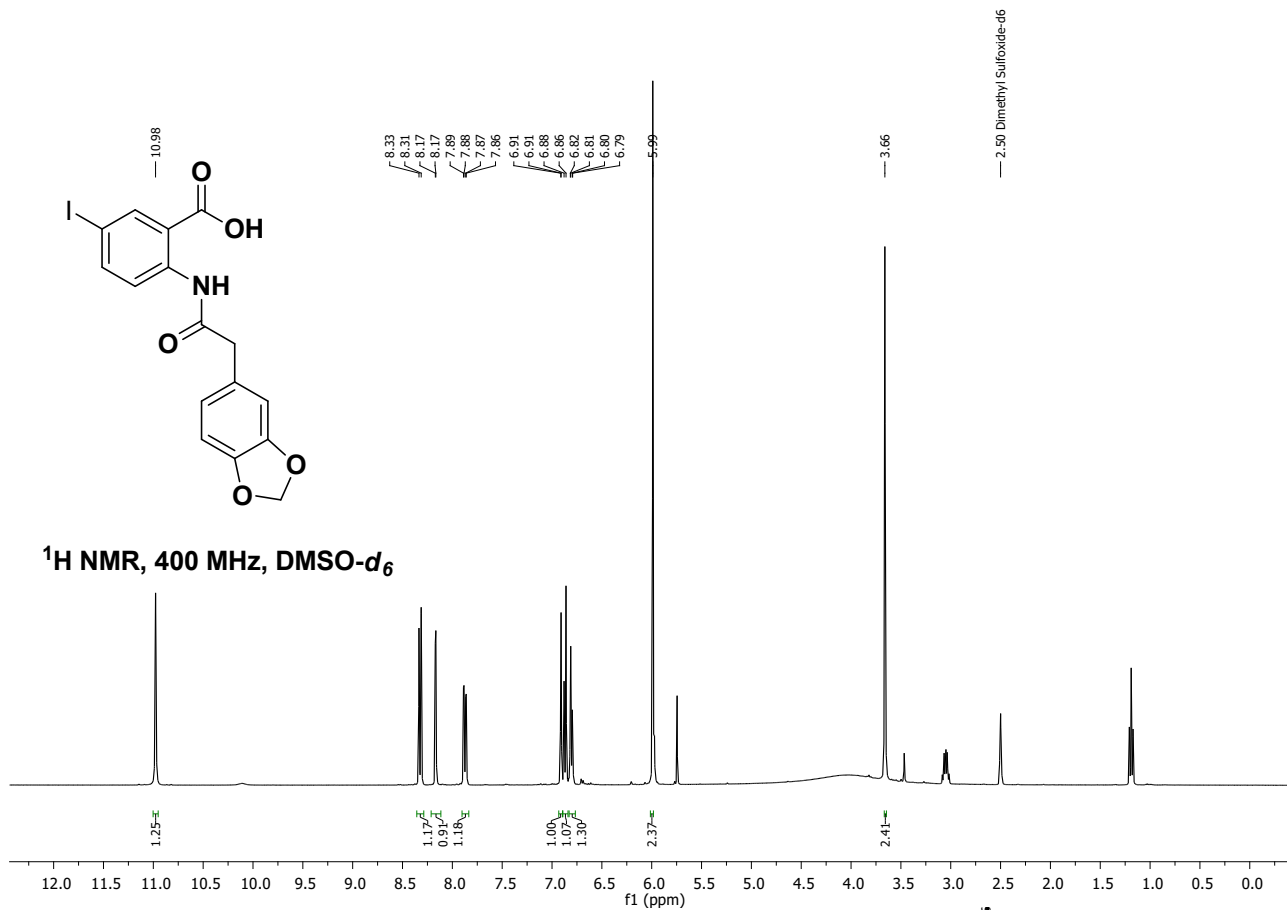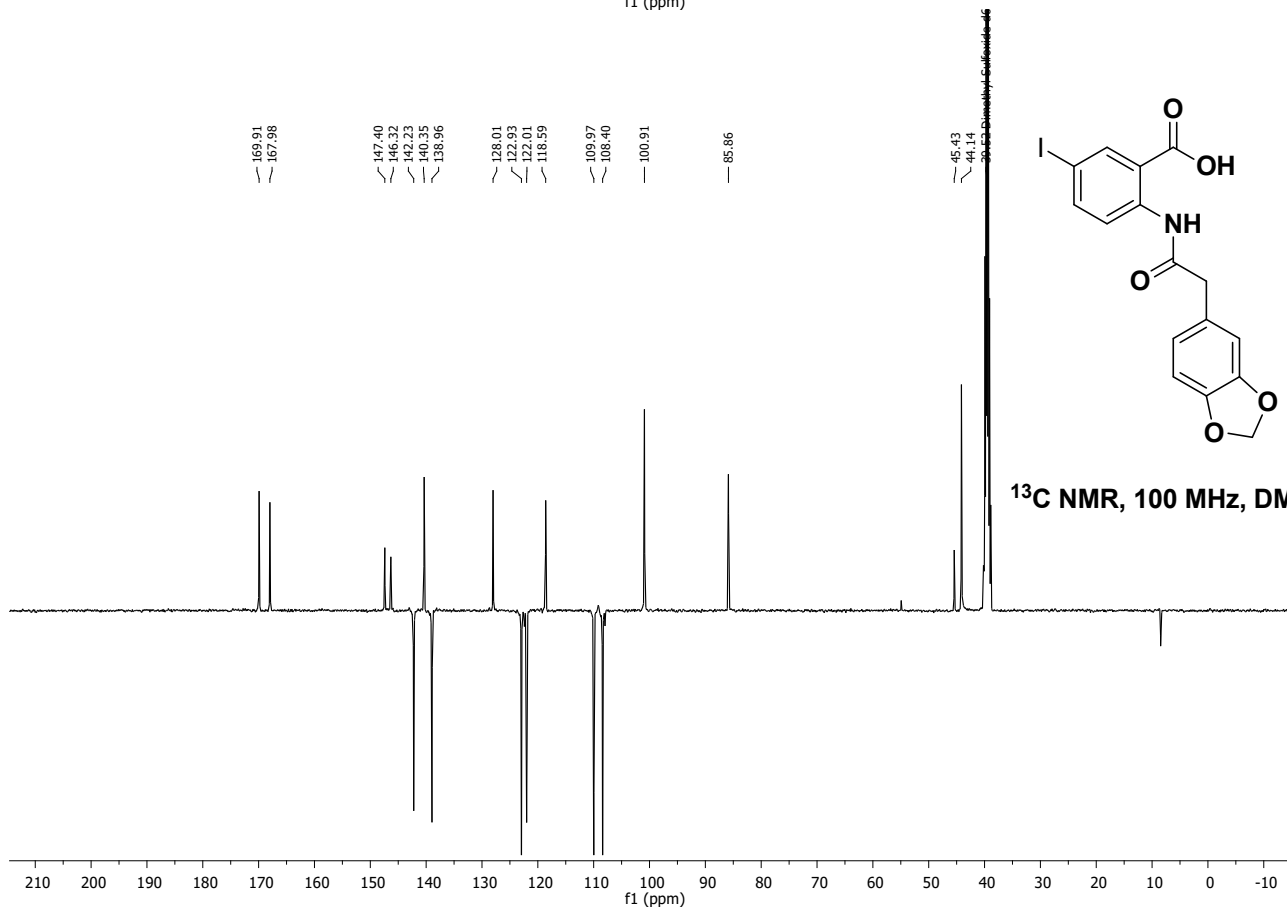

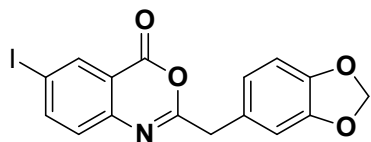

**<sup>1</sup>H NMR, 400 MHz, DMSO-*d*<sub>6</sub>**

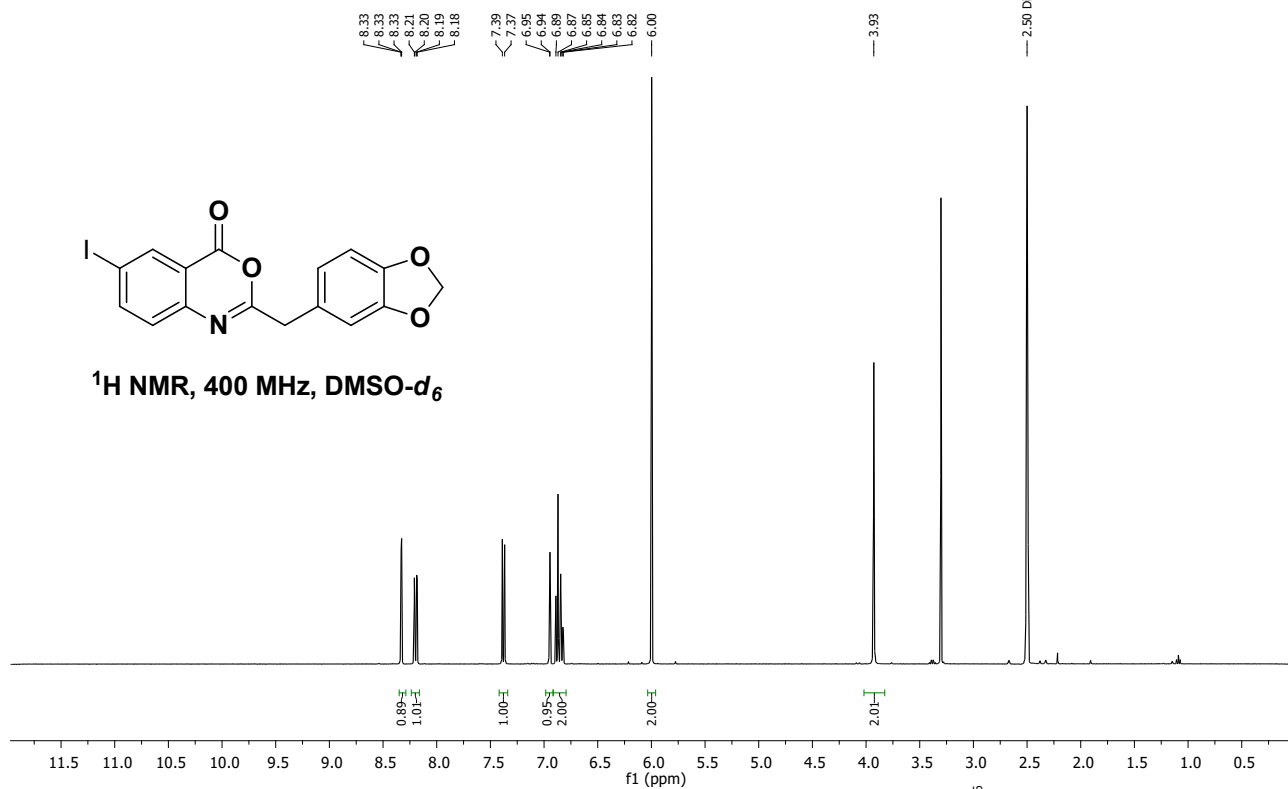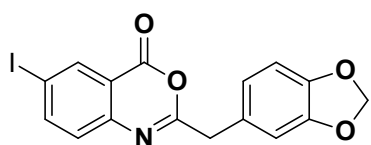

**<sup>13</sup>C NMR, 100 MHz, DMSO-*d*<sub>6</sub>**

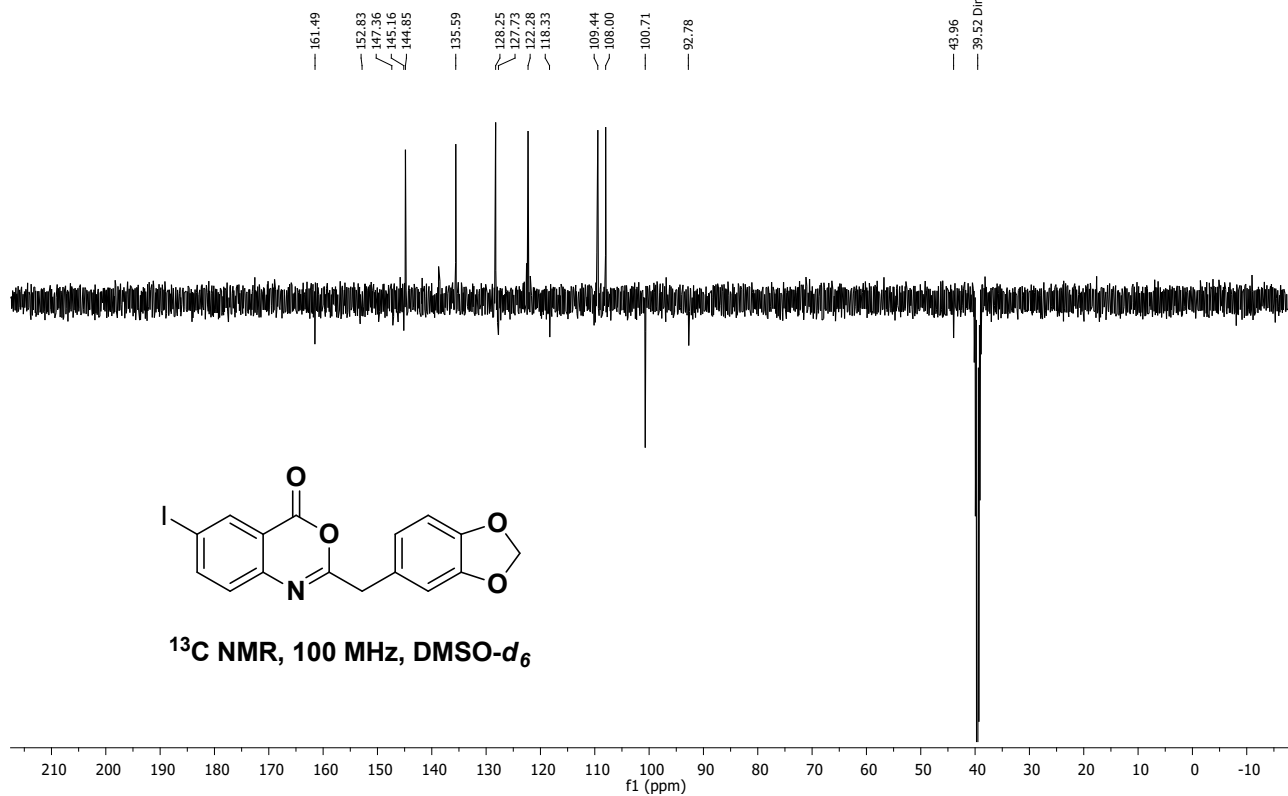



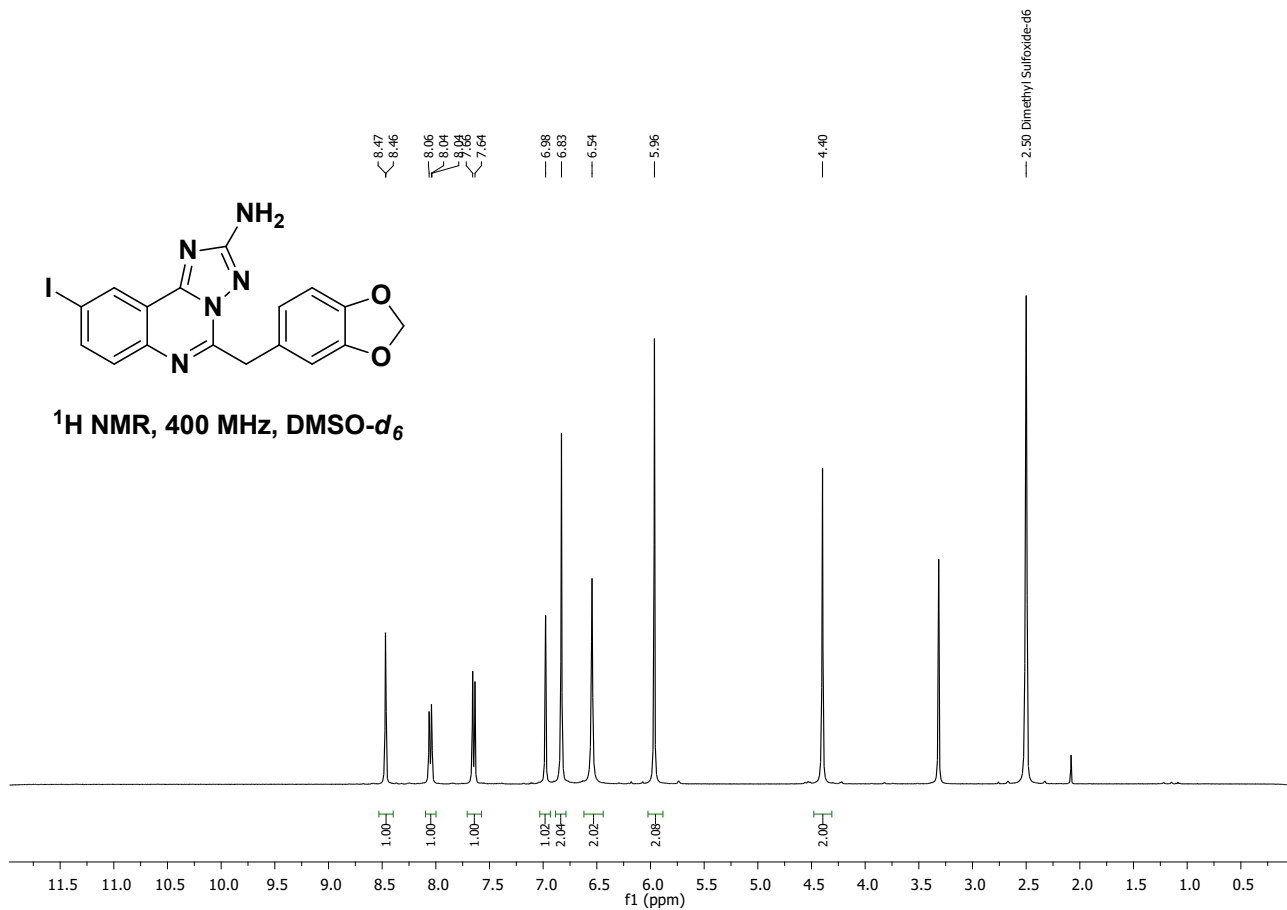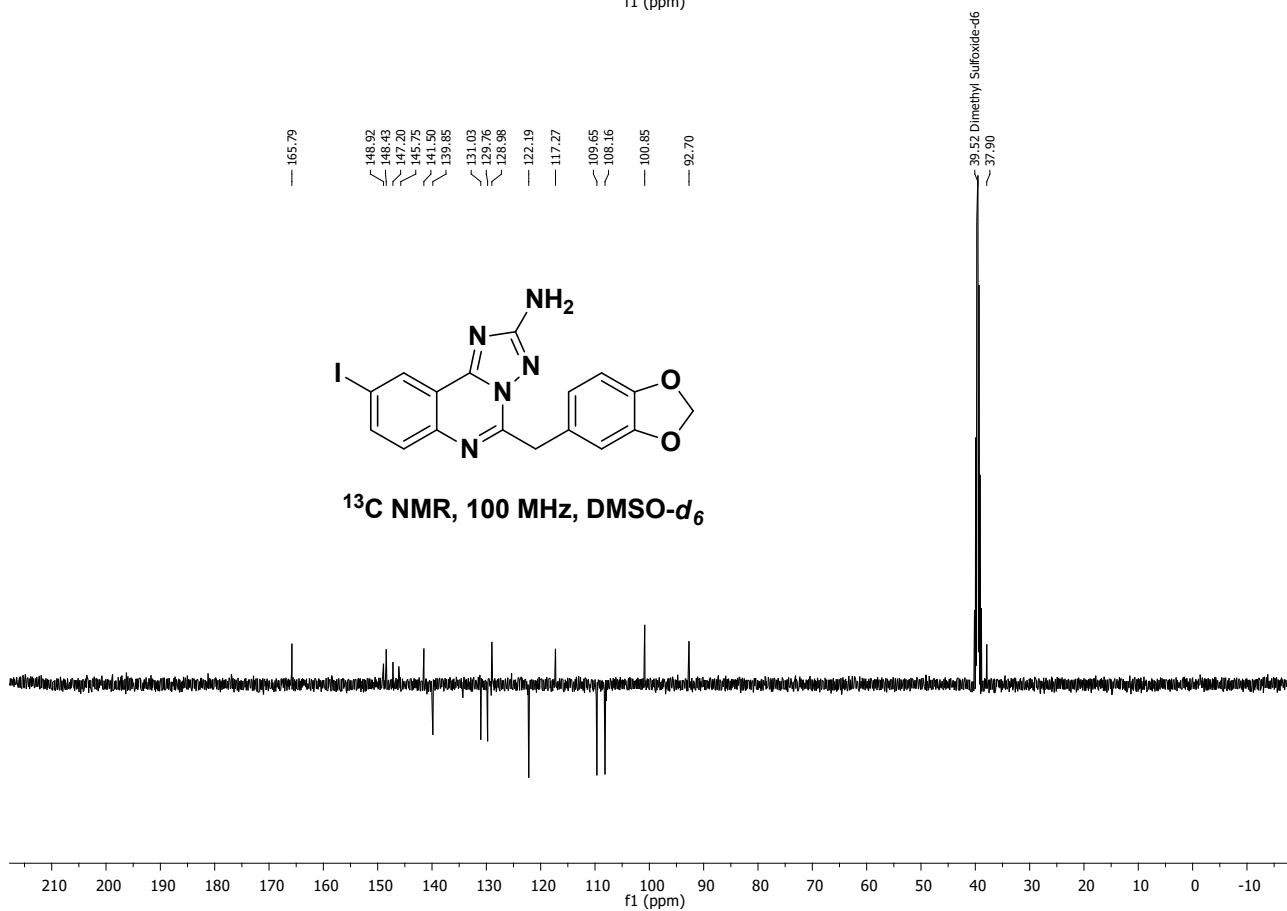

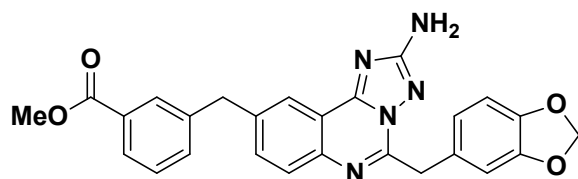

$^1\text{H NMR}$ , 400 MHz,  $\text{CDCl}_3$

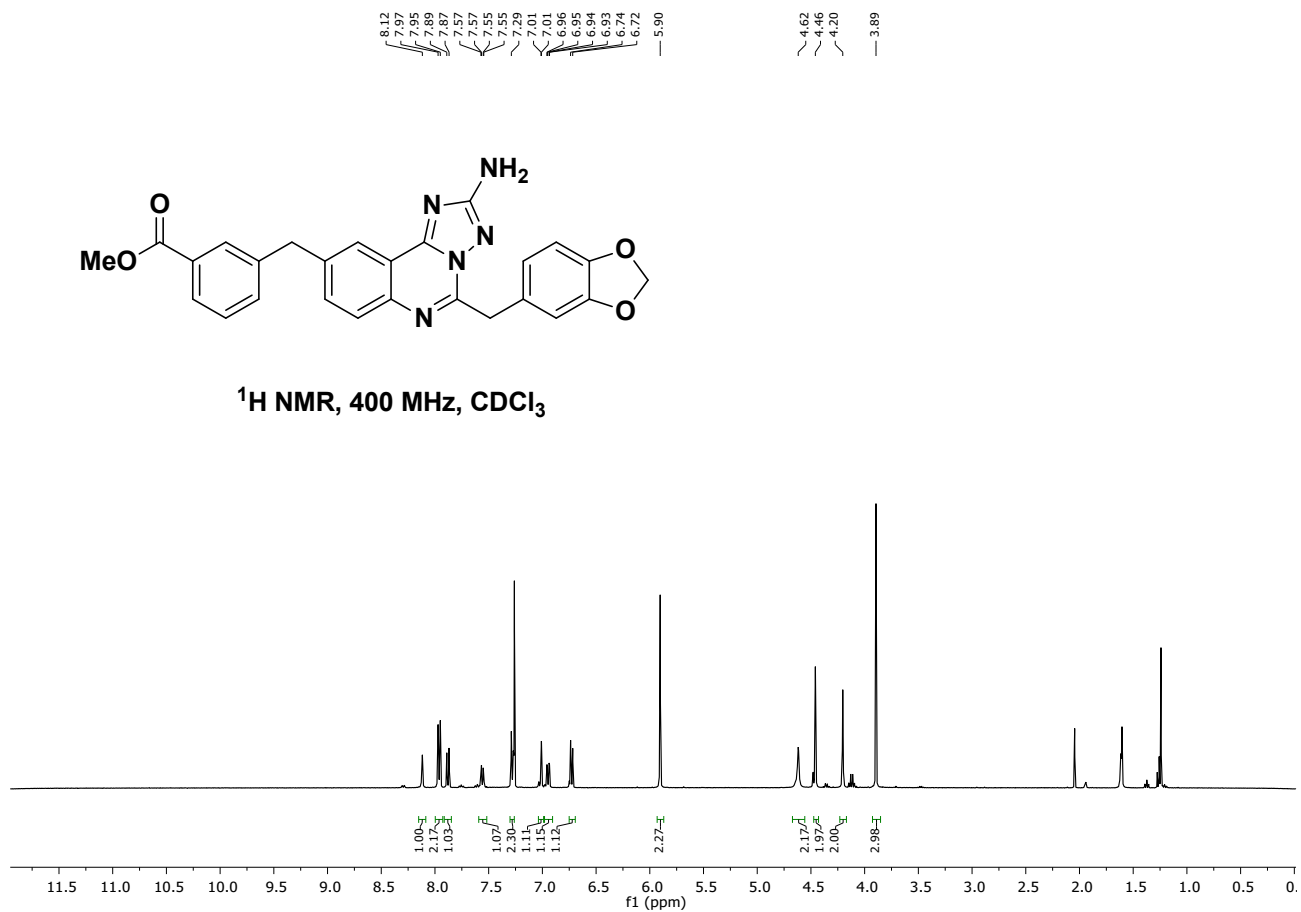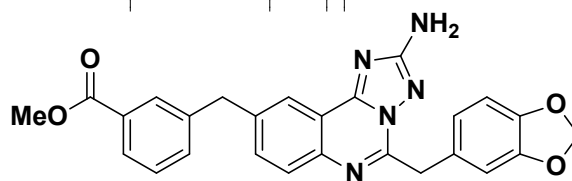

$^{13}\text{C NMR}$ , 100 MHz,  $\text{CDCl}_3$

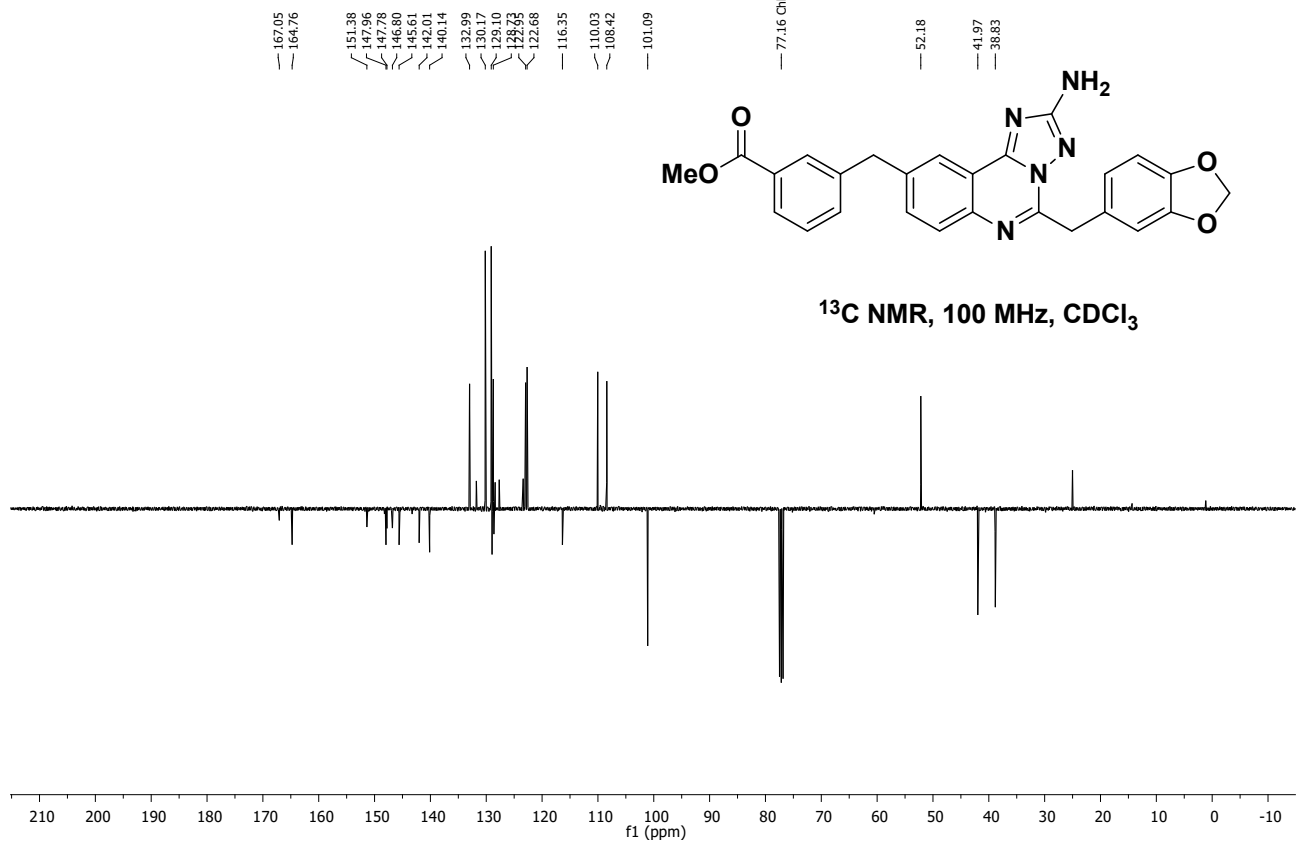

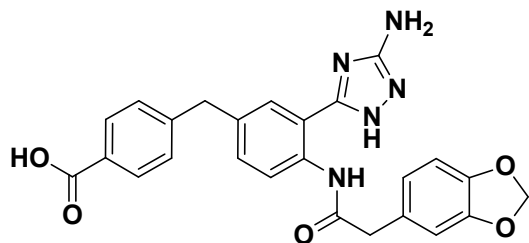

<sup>1</sup>H NMR, 400 MHz, DMSO-d<sub>6</sub>

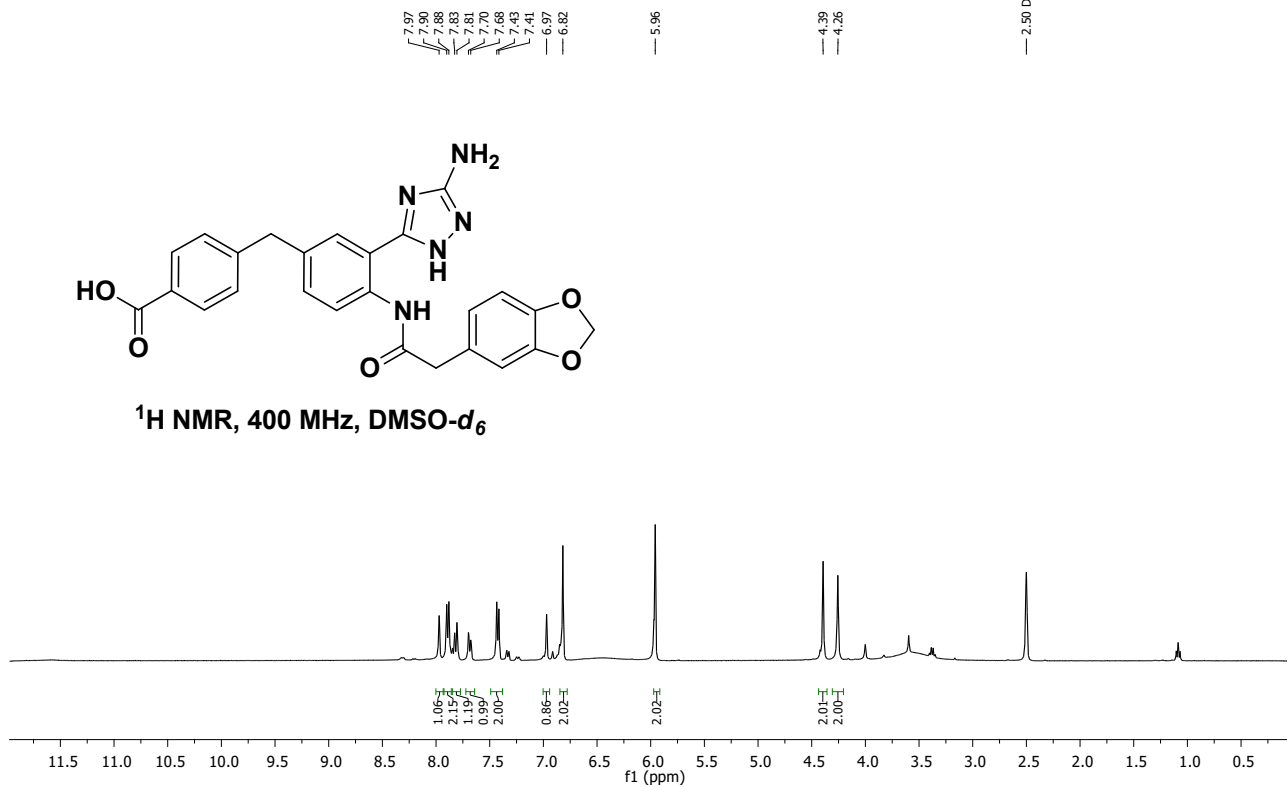

167.82, 166.28, 150.76, 148.09, 147.85, 146.91, 146.43, 141.63, 140.87, 133.30, 129.81, 129.50, 128.57, 122.76, 122.73, 116.06, 110.25, 108.82, 101.51

41.11, 39.52 Dimethyl Sulfoxide-d<sub>6</sub>, 38.47

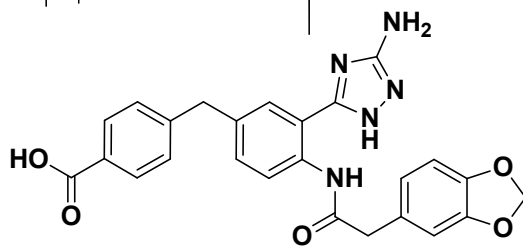

<sup>13</sup>C NMR, 100 MHz, DMSO-d<sub>6</sub>

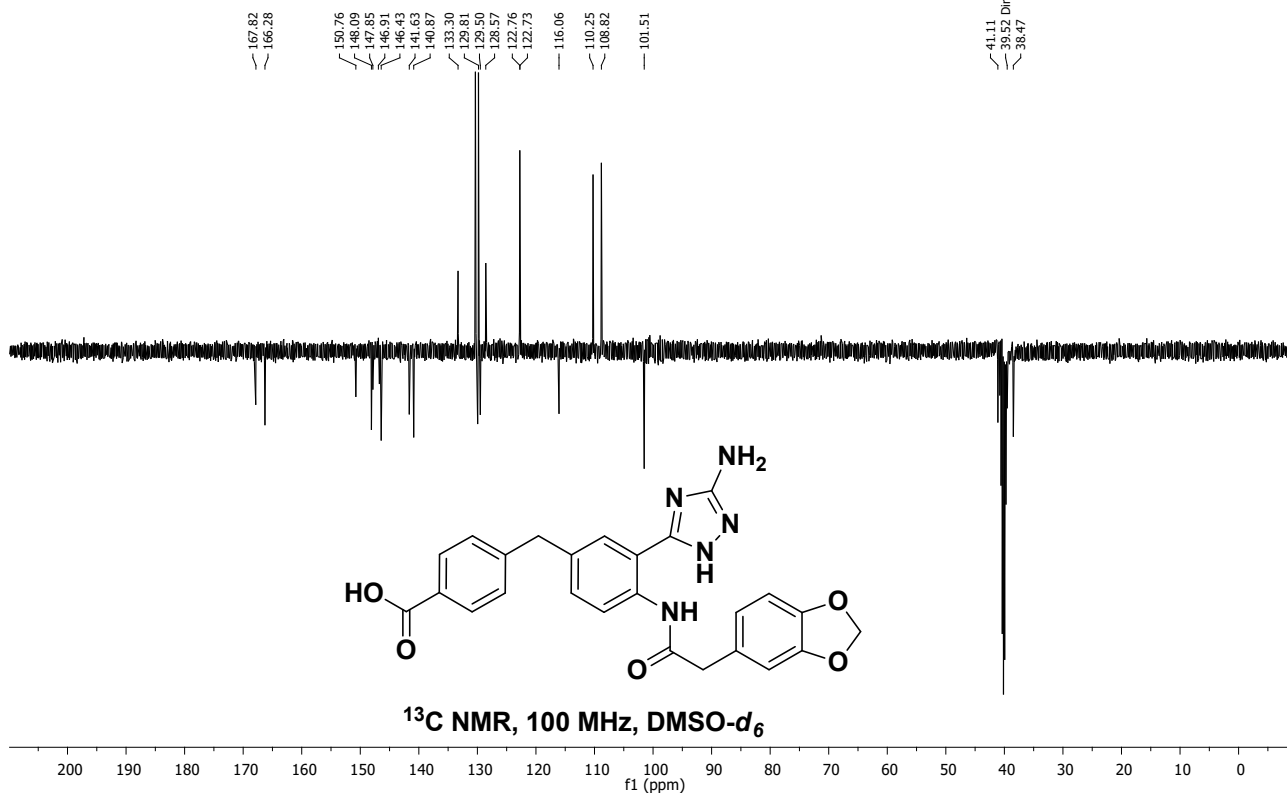

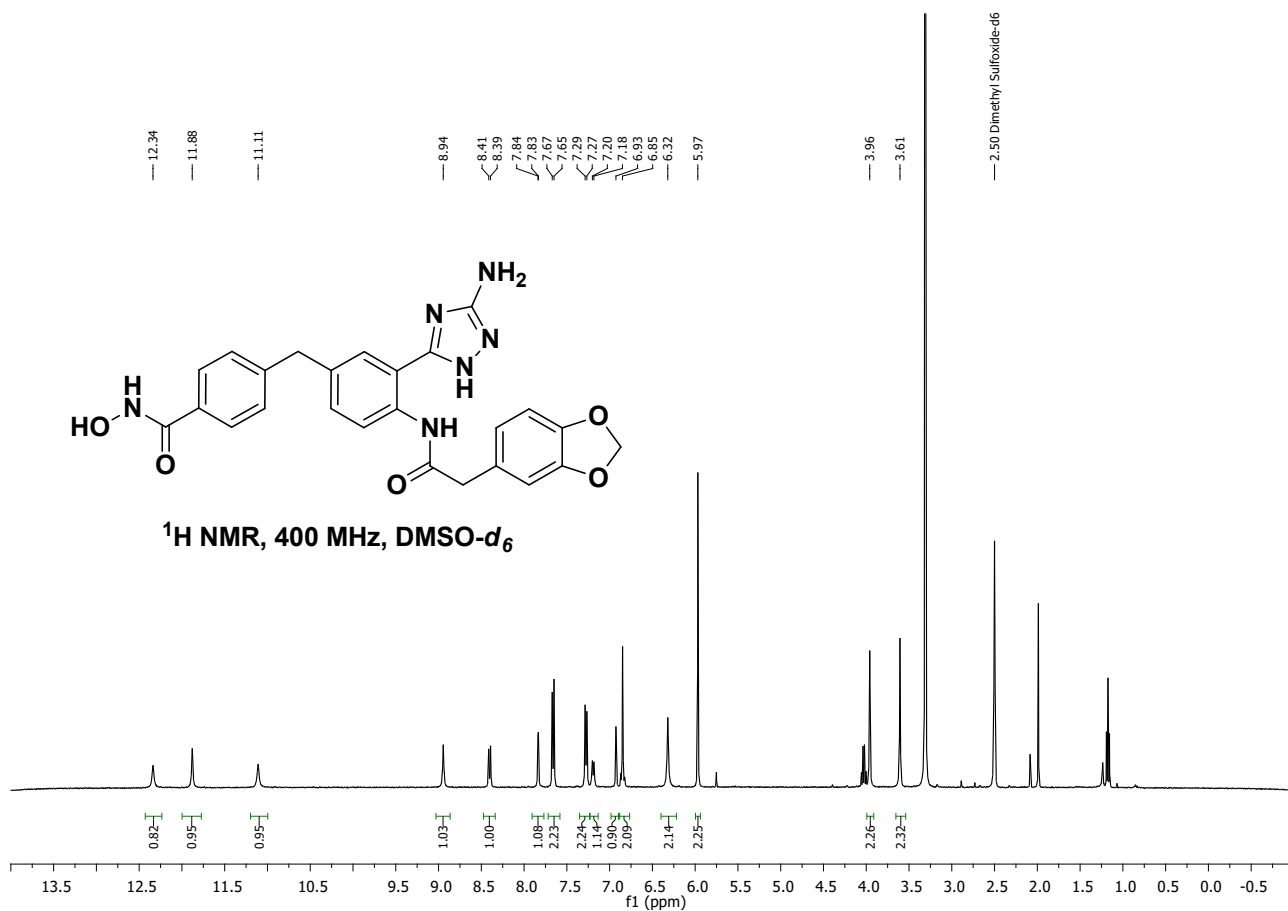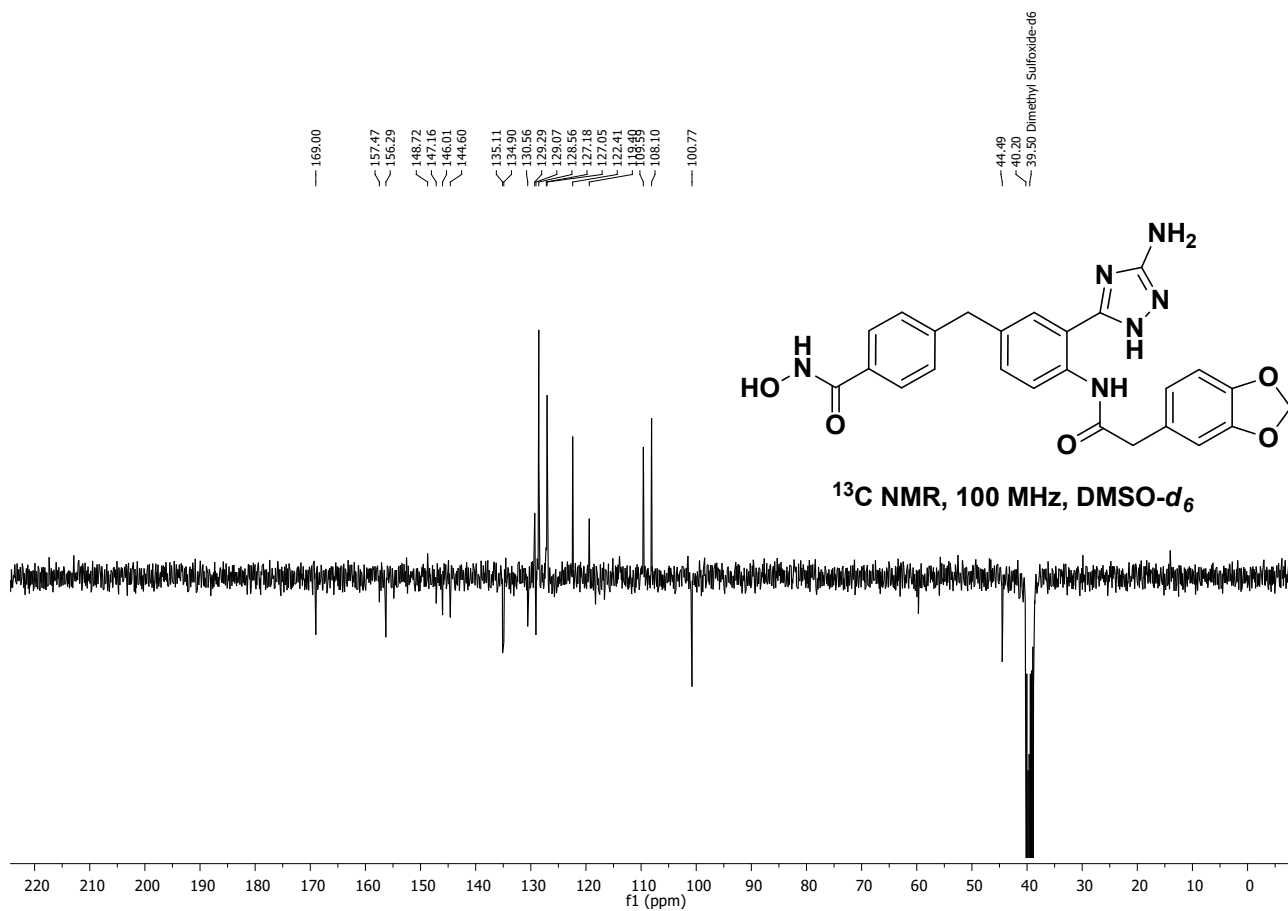

### HPLC-MS for 11a and 18

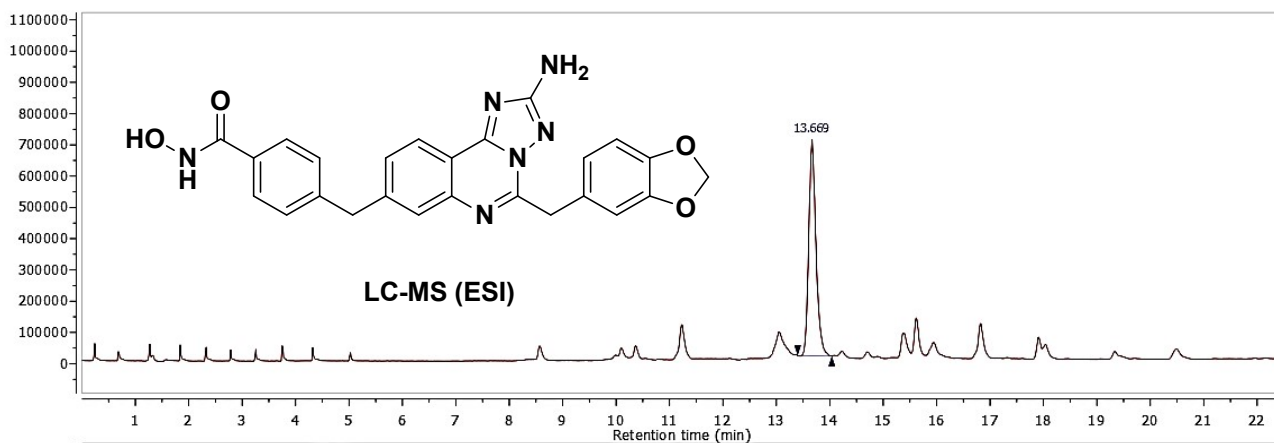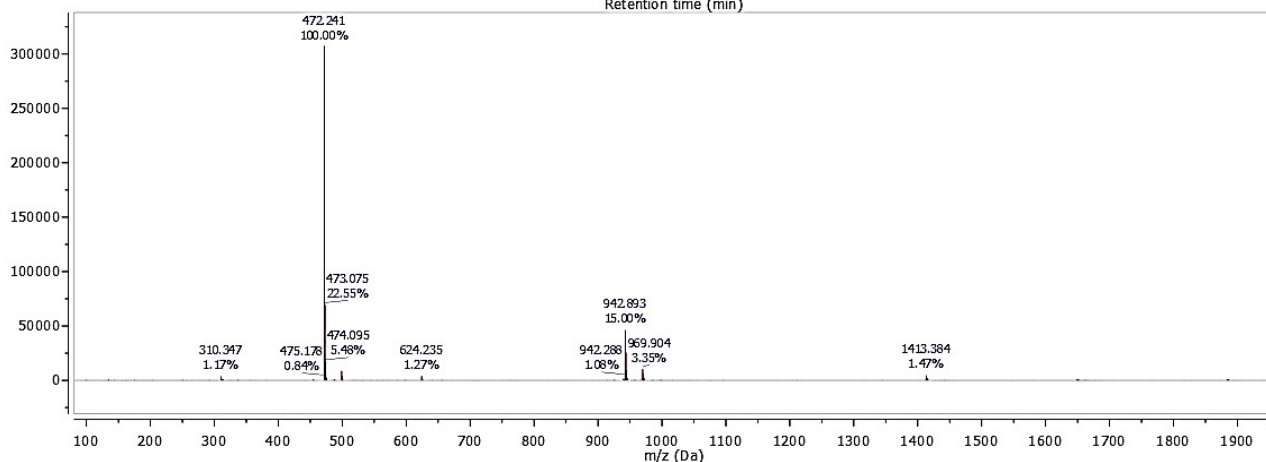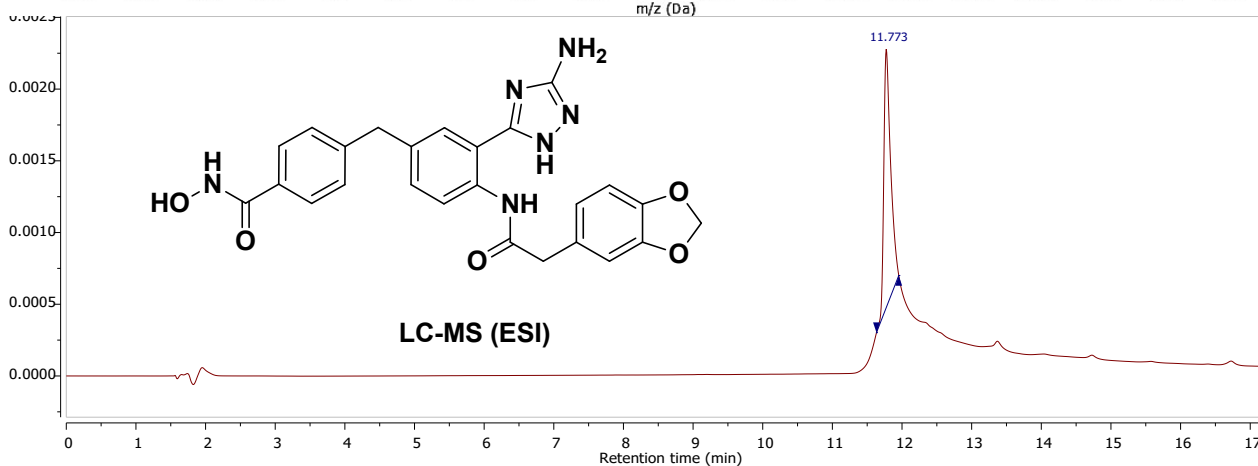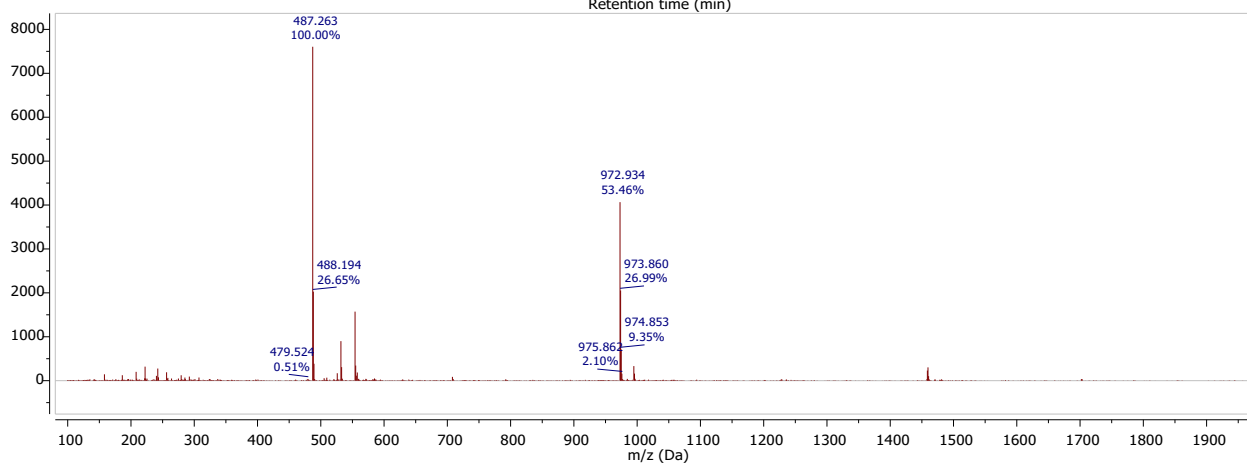

Supplement: RA-012-D2RA01753A-s001.pdf [file RA-012-D2RA01753A-s001.pdf]
